# Supplementary material for: Reviewers and Guest Associate Editors
Source: Atypon-hosted journal article supplement (doi:10.1287/mnsc.1120.1527), 2012-03-01
Supplement: mnsc.1120.1527-sm-2011_reviewers-all.pdf [file mnsc.1120.1527-sm-2011_reviewers-all.pdf]

| <b>Last Name</b> | <b>First Name</b> | <b>Institution</b>                          |
|------------------|-------------------|---------------------------------------------|
| Abarbanell       | Jeffery           | University of North Carolina at Chapel Hill |
| Abdellaoui       | Mohammed          | HEC Paris                                   |
| Abhishek         | Vibhanshu         | University of Pennsylvania                  |
| Aboody           | David             | University of California, Los Angeles       |
| Acquisti         | Alessandro        | Carnegie Mellon University                  |
| Adams            | Renee             | University of Queensland                    |
| Adegbesan        | Tunji             | Pan-African University                      |
| Adida            | Elodie            | University of Illinois at Chicago           |
| Adomavicius      | Gediminas         | University of Minnesota                     |
| Adrian           | Tobias            | Federal Reserve Bank of New York            |
| Afeche           | Philipp           | University of Toronto                       |
| Agarwal          | Ashish            | University of Texas at Austin               |
| Agarwal          | Rajshree          | University of Maryland                      |
| Aggarwal         | Rajesh            | University of Minnesota                     |
| Agrawal          | Vishal            | Georgetown University                       |
| Ahern            | Kenneth           | University of Michigan                      |
| Ahn              | Byeong Seok       | Chung-Ang University                        |
| Ahn              | Hyun-soo          | University of Michigan                      |
| Ai               | Hengjie           | Duke University                             |
| Ainslie          | Andrew            | University of California, Los Angeles       |
| AitSahlia        | Farid             | University of Florida                       |
| Aksin            | Zeynep            | Koc University                              |
| Alagoz           | Oguzhan           | University of Wisconsin-Madison             |
| Alan             | Yasin             | Cornell University                          |
| Alaoui           | Larbi             | Universitat Pompeu Fabra                    |
| Albuquerque      | Ana               | Boston University                           |
| Albuquerque      | Paulo             | University of Rochester                     |
| Aldashev         | Gani              | University of Namur                         |
| Alexandrov       | Alexei            | Northwestern University                     |
| Allon            | Gad               | Northwestern University                     |
| Aloysius         | John              | University of Arkansas                      |
| Anand            | Jay               | The Ohio State University                   |
| Anand            | Krishnan          | University of Utah                          |
| Anand            | Amber             | Syracuse University                         |
| Anderson         | Chris             | Cornell University                          |
| Anderson         | Edward            | University of Sydney                        |
| Anderson         | Eric              | Northwestern University                     |
| Anderson         | Ronald            | American University                         |
| Angelus          | Alexandar         | Singapore Management University             |
| Angst            | Corey             | University of Notre Dame                    |
| Animesh          | Animesh           | McGill University                           |
| Aperjis          | Christina         | HP Labs                                     |
| Apesteguia       | Jose              | Universitat Pompeu Fabra                    |
| Aragon           | George            | Arizona State University                    |
| Araman           | Victor            | New York University                         |
| Aravindakshan    | Ashwin            | University of California, Davis             |
| Aribarg          | Anocha            | University of Michigan                      |
| Arlotto          | Alessandro        | University of Pennsylvania                  |
| Armantier        | Olivier           | Federal Reserve Bank of New York            |
| Armbruster       | Benjamin          | Northwestern University                     |
| Armstrong        | Christopher       | University of Pennsylvania                  |
| Aron             | Ravi              | University of Southern California           |
| Arora            | Neeraj            | University of Wisconsin-Madison             |
| Arozamena        | Leandro           | Universidad Torcuato Di Tella               |

|                 |             |                                                       |
|-----------------|-------------|-------------------------------------------------------|
| Arya            | Anil        | The Ohio State University                             |
| Ascarza         | Eva         | Columbia University                                   |
| Asdemir         | Kursad      | American University of the Middle East                |
| Ashlagi         | Itai        | Massachusetts Institute of Technology                 |
| Asparouhova     | Elena       | University of Utah                                    |
| Astebro         | Thomas      | University of Toronto                                 |
| Ata             | Baris       | Northwestern University                               |
| Atamturk        | Alper       | University of California, Berkeley                    |
| Atanassov       | Julian      | University of Oregon                                  |
| Atasu           | Atalay      | Georgia Institute of Technology                       |
| Augenblick      | Ned         | University of California, Berkeley                    |
| August          | Terrence    | University of California at San Diego                 |
| Aven            | Brandy      | Carnegie Mellon University                            |
| Aydin           | Goker       | Indiana University                                    |
| Aydinliyim      | Tolga       | University of Oregon                                  |
| Baber           | William     | Georgetown University                                 |
| Babich          | Volodymyr   | Georgetown University                                 |
| Babus           | Ana         | Imperial College London                               |
| Bade            | Sophie      | Max Planck Institute for Research on Collective Goods |
| Bagues          | Manuel      | Universidad Carlos III de Madrid                      |
| Bahn            | Olivier     | HEC Montréal                                          |
| Bai             | Jennie      | Federal Reserve Bank of New York                      |
| Bai             | Xue         | University of Connecticut                             |
| Baillon         | Aurelien    | Erasmus University Rotterdam                          |
| Baker           | Erin        | University of Massachusetts Amherst                   |
| Bakshi          | Gurdip      | University of Maryland                                |
| Bala            | Hillo       | Indiana University                                    |
| Balachander     | Subramanian | Purdue University                                     |
| Balafoutas      | Loukas      | University of Innsbruck                               |
| Balakrishnan    | Ramji       | University of Iowa                                    |
| Balasubramanian | Sridhar     | University of North Carolina at Chapel Hill           |
| Baldwin-Clark   | LaToya      | Stanford University                                   |
| Bali            | Turan       | Baruch College                                        |
| Balkundi        | Prasad      | University at Buffalo                                 |
| Ball            | Ryan        | University of Chicago                                 |
| Ballotta        | Laura       | City University London                                |
| Bamber          | Linda       | University of Georgia                                 |
| Banciu          | Mihai       | Bucknell University                                   |
| Bao             | Yong        | Purdue University                                     |
| Bapna           | Ravi        | University of Minnesota                               |
| Barber          | Brad        | University of California, Davis                       |
| Barberis        | Nicholas    | Yale University                                       |
| Barbieri        | Stefano     | Tulane University                                     |
| Bardhan         | Indranil    | University of Texas at Dallas                         |
| Bar-Isaac       | Heski       | New York University                                   |
| Barnett         | William     | Stanford University                                   |
| Baron           | Opher       | University of Toronto                                 |
| Bart            | Yakov       | INSEAD                                                |
| Bartels         | Dan         | Columbia University                                   |
| Bassamboo       | Achal       | Northwestern University                               |
| Bates           | David       | University of Iowa                                    |
| Batra           | Rajeev      | University of Michigan                                |
| Batt            | Robert      | University of Pennsylvania                            |
| Battalio        | Robert      | University of Notre Dame                              |

|                |            |                                            |
|----------------|------------|--------------------------------------------|
| Baucells       | Manel      | Universitat Pompeu Fabra                   |
| Bayati         | Mohsen     | Stanford University                        |
| Bayraktar      | Erhan      | University of Michigan                     |
| Bazarova       | Natalie    | Cornell University                         |
| Bearden        | J. Neil    | INSEAD                                     |
| Beardsley      | Xiaoxin    | Southern Illinois University               |
| Beber          | Alessandro | University of Amsterdam                    |
| Bechky         | Beth       | University of California, Davis            |
| Beck           | Nikolaus   | University of Lugano                       |
| Becker         | Bo         | Harvard University                         |
| Beil           | Damian     | University of Michigan                     |
| Belenzon       | Sharon     | Duke University                            |
| Beling         | Peter      | University of Virginia                     |
| Belo           | Frederico  | University of Minnesota                    |
| Benard         | Stephen    | Indiana University                         |
| Bender         | Christian  | Saarland University                        |
| Bengtsson      | Ola        | University of Illinois at Urbana-Champaign |
| Benjaafar      | Saif       | University of Minnesota                    |
| Benner         | Mary       | University of Minnesota                    |
| Bercovitz      | Janet      | University of Illinois at Urbana-Champaign |
| Berger         | Jonah      | University of Pennsylvania                 |
| Berling        | Peter      | Lund University                            |
| Bertomeu       | Jeremy     | Northwestern University                    |
| Bertschek      | Irene      | Centre for European Economic Research      |
| Besbes         | Omar       | Columbia University                        |
| Beyer          | Anne       | Stanford University                        |
| Bezembinder    | Thom       | University of Nijmegen                     |
| Bhagat         | Sanjai     | University of Colorado at Boulder          |
| Bhamra         | Harjoat    | University of British Columbia             |
| Bhardwaj       | Pradeep    | University of British Columbia             |
| Bhargava       | Hemant     | University of California, Davis            |
| Bhaskaran      | Sreekumar  | Southern Methodist University              |
| Bhattacharya   | Shantanu   | INSEAD                                     |
| Bi             | Henry      | Willamette University                      |
| Bichler        | Martin     | Technical University of Munich             |
| Bickel         | J. Eric    | Texas A&M University                       |
| Bielby         | William    | University of Illinois at Chicago          |
| Billett        | Matthew    | University of Iowa                         |
| Bimpikis       | Kostas     | Massachusetts Institute of Technology      |
| Bisi           | Arnab      | Purdue University                          |
| Biyalogorsky   | Eyal       | IDC Herzliya                               |
| Bjarnadottir   | Margret    | University of Maryland                     |
| Blanes i Vidal | Jordi      | London School of Economics                 |
| Blavatsky      | Pavlo      | University of Innsbruck                    |
| Blouin         | Jennifer   | University of Pennsylvania                 |
| Boatwright     | Peter      | Carnegie Mellon University                 |
| Bockenholt     | Ulf        | Northwestern University                    |
| Bockstedt      | Jesse      | George Mason University                    |
| Bodapati       | Anand      | University of California, Los Angeles      |
| Boehmer        | Ekkehart   | EDHEC Business School                      |
| Bohme          | Rainer     | University of Münster                      |
| Bolton         | Gary       | Pennsylvania State University              |
| Bonatti        | Alessandro | Massachusetts Institute of Technology      |
| Bond           | Philip     | University of Minnesota                    |
| Bordley        | Robert     | University of Michigan                     |

|              |            |                                         |
|--------------|------------|-----------------------------------------|
| Borle        | Sharad     | Rice University                         |
| Bothner      | Matthew    | Cornell University                      |
| Boudreau     | Kevin      | London Business School                  |
| Bouvard      | Matthieu   | McGill University                       |
| Bouwens      | Jan        | Tilburg University                      |
| Boyabatli    | Onur       | Singapore Management University         |
| Boyer        | Brian      | Brigham Young University                |
| Boyer        | M. Martin  | HEC Montréal                            |
| Braguinsky   | Serguey    | University at Buffalo                   |
| Brañas-Garza | Pablo      | University of Granada                   |
| Braouezec    | Yann       | IESEG School of Management              |
| Braun        | Michael    | Massachusetts Institute of Technology   |
| Bray         | Robert     | Stanford University                     |
| Breitmoser   | Yves       | Viadrina European University            |
| Breon-Drish  | Bradyn     | Stanford University                     |
| Breschi      | Stefano    | Bocconi University                      |
| Brochet      | Francois   | Harvard University                      |
| Brogaard     | Jonathan   | University of Washington                |
| Brown        | Alexander  | Texas A&M University                    |
| Brown        | David      | Duke University                         |
| Brown        | Jen        | Northwestern University                 |
| Brown        | Sue        | University of Arizona                   |
| Brownlees    | Christian  | Universitat Pompeu Fabra                |
| Bryce        | David      | Brigham Young University                |
| Bucklin      | Randy      | University of California, Los Angeles   |
| Budde        | Joerg      | University of Bonn                      |
| Burks        | Stephen    | University of Minnesota, Morris         |
| Burnetas     | Apostolos  | University of Athens                    |
| Burson       | Katherine  | University of Michigan                  |
| Burton-Jones | Andrew     | University of British Columbia          |
| Bushee       | Brian      | University of Pennsylvania              |
| Butler       | Brian      | University of Pittsburgh                |
| Butler       | John       | University of Texas at Austin           |
| Byford       | Martin     | Royal Melbourne Institute of Technology |
| Cabral       | Luis       | New York University                     |
| Cabrales     | Antonio    | Universidad Carlos III de Madrid        |
| Cadman       | Brian      | University of Utah                      |
| Cafilisch    | Russel     | University of California, Los Angeles   |
| Caggese      | Andrea     | Universitat Pompeu Fabra                |
| Calafiore    | Giuseppe   | Polytechnic University of Turin         |
| Caldentey    | Rene       | New York University                     |
| Calvano      | Emilio     | Bocconi University                      |
| Campbell     | Ann        | University of Iowa                      |
| Campbell     | Benjamin   | The Ohio State University               |
| Campbell     | Dennis     | Harvard University                      |
| Cannella     | Albert     | Tulane University                       |
| Cantillon    | Estelle    | Université Libre de Bruxelles           |
| Capkun       | Vedran     | HEC Paris                               |
| Caprara      | Alberto    | University of Bologna                   |
| Carlin       | Bruce      | University of California, Los Angeles   |
| Carlson      | Murray     | University of British Columbia          |
| Caro         | Felipe     | University of California, Los Angeles   |
| Carpenter    | Jeffrey    | Middlebury College                      |
| Carpenter    | Jennifer   | New York University                     |
| Carter       | Mary Ellen | Boston College                          |

|                |            |                                                       |
|----------------|------------|-------------------------------------------------------|
| Casamatta      | Catherine  | Université Toulouse 1 Capitole                        |
| Casas-Arce     | Pablo      | Universitat Pompeu Fabra                              |
| Casciaro       | Tiziana    | University of Toronto                                 |
| Caskey         | Judson     | University of California, Los Angeles                 |
| Cason          | Timothy    | Purdue University                                     |
| Cassar         | Alessandra | University of San Francisco                           |
| Catalini       | Christian  | University of Toronto                                 |
| Cattani        | Gino       | New York University                                   |
| Cen            | Ling       | University of Toronto                                 |
| Chabakauri     | Georgy     | London School of Economics                            |
| Chabi-Yo       | Fousseni   | The Ohio State University                             |
| Chade          | Hector     | Arizona State University                              |
| Chakraborty    | Archishman | York University                                       |
| Champonnois    | Sylvain    | University of California at San Diego                 |
| Chan           | Carri      | Columbia University                                   |
| Chan           | Tat        | Washington University in St. Louis                    |
| Chandrasekaran | Aravind    | The Ohio State University                             |
| Chandrasekaran | Deepa      | Lehigh University                                     |
| Chandy         | Rajesh     | London Business School                                |
| Chang          | Jerry      | University of Nevada, Las Vegas                       |
| Chang          | Sea-Jin    | National University of Singapore                      |
| Chang          | Young Bong | Ulsan National Institute of Science and<br>Technology |
| Chao           | Xiuli      | University of Michigan                                |
| Chapman        | Gretchen   | Rutgers University                                    |
| Chari          | Kaushal    | University of South Florida                           |
| Chatterjee     | Kalyan     | Pennsylvania State University                         |
| Chaudhuri      | Ananish    | University of Auckland                                |
| Chava          | Sudheer    | Georgia Institute of Technology                       |
| Chellappa      | Ramnath    | Emory University                                      |
| Chemmanur      | Thomas     | Boston College                                        |
| Chen           | Chialin    | Queen's University                                    |
| Chen           | Jianqing   | University of Calgary                                 |
| Chen           | Kay-Yut    | HP Labs                                               |
| Chen           | Li         | Duke University                                       |
| Chen           | Long       | Washington University in St. Louis                    |
| Chen           | Pinyuen    | Syracuse University                                   |
| Chen           | Qi         | Duke University                                       |
| Chen           | Rachel     | University of California, Davis                       |
| Chen           | Roy        | University of Michigan                                |
| Chen           | Xin        | University of Illinois at Urbana-Champaign            |
| Chen           | Ying-Ju    | University of California, Berkeley                    |
| Chen           | Yuanyuan   | National University of Singapore                      |
| Chen           | Yubo       | University of Arizona                                 |
| Cheng          | Ing-Haw    | University of Michigan                                |
| Cheng          | Shijun     | University of Maryland                                |
| Cheridito      | Patrick    | Princeton University                                  |
| Chernev        | Alexander  | Northwestern University                               |
| Chernov        | Mikhail    | London Business School                                |
| Chiang         | Robert     | Fordham University                                    |
| Ching          | Andrew     | University of Toronto                                 |
| Cho            | Soo-Haeng  | Carnegie Mellon University                            |
| Chod           | Jiri       | Boston College                                        |
| Choi           | Darwin     | Hong Kong University of Science and Technology        |

|                |            |                                              |
|----------------|------------|----------------------------------------------|
| Choi           | James      | Yale University                              |
| Choi           | Jeonghye   | Yonsei University                            |
| Choi           | S. Chan    | Rutgers University                           |
| Choi           | Syngjoo    | University College London                    |
| Choo           | Adrian     | Rensselaer Polytechnic Institute             |
| Chorus         | Caspar     | Delft University of Technology               |
| Choudhary      | Vidyanand  | University of California, Irvine             |
| Choudhury      | Prithwiraj | University of Pennsylvania                   |
| Christen       | Markus     | INSEAD                                       |
| Christensen    | Jens       | Federal Reserve Bank of San Francisco        |
| Christensen    | Ted        | Brigham Young University                     |
| Christin       | Nicolas    | Carnegie Mellon University                   |
| Christoffel    | Katherine  | Northwestern University                      |
| Christoffersen | Peter      | University of Toronto                        |
| Chu            | Jenny      | University of California, Berkeley           |
| Chu            | Leon       | University of Southern California            |
| Chung          | Wilbur     | University of Maryland                       |
| Claussen       | Jörg       | University of Munich                         |
| Clement        | Michael    | University of Texas at Austin                |
| Clement        | Michel     | University of Hamburg                        |
| Cohen          | Daniel     | New York University                          |
| Cohen          | Lisa       | McGill University                            |
| Cohn           | Jonathan   | University of Texas at Austin                |
| Coles          | Peter      | Harvard University                           |
| Colyvas        | Jeannette  | Northwestern University                      |
| Comerton-Forde | Carole     | Australian National University               |
| Conboy         | Kieran     | National University of Ireland, Galway       |
| Conley         | Tim        | University of Western Ontario                |
| Conlon         | Chris      | Columbia University                          |
| Conti          | Annamaria  | Georgia Institute of Technology              |
| Cooper         | William    | University of Texas at Austin                |
| Cording        | Margaret   | Rice University                              |
| Cornaggia      | Kimberly   | American University                          |
| Corona         | Carlos     | University of Texas at Austin                |
| Costa-Gomes    | Miguel     | University of Aberdeen                       |
| Cotter         | John       | University College Dublin                    |
| Courty         | Pascal     | University of Victoria                       |
| Crainich       | David      | Centre National de la Recherche Scientifique |
| Crama          | Pascale    | Singapore Management University              |
| Criscuolo      | Paola      | Imperial College London                      |
| Cronin         | Matthew    | George Mason University                      |
| Crump          | Richard    | Federal Reserve Bank of New York             |
| Csaszar        | Felipe     | INSEAD                                       |
| Cui            | Tony       | University of Minnesota                      |
| Cvitanic       | Jaksa      | California Institute of Technology           |
| Da             | Zhi        | University of Notre Dame                     |
| Da Rin         | Marco      | Tilburg University                           |
| Dada           | Maqbool    | Johns Hopkins University                     |
| Dahiya         | Sandeep    | Georgetown University                        |
| Dahl           | Michael    | Aalborg University                           |
| Dana           | James      | Northeastern University                      |
| Dana           | Jason      | University of Pennsylvania                   |
| Danaher        | Peter      | University of Melbourne                      |
| Daniel         | Kent       | Columbia University                          |
| D'Arcy         | John       | University of Notre Dame                     |

|                |              |                                            |
|----------------|--------------|--------------------------------------------|
| Dasgupta       | Srabana      | University of British Columbia             |
| Datta          | Sumon        | Purdue University                          |
| David          | Robert       | McGill University                          |
| Davies         | Jane         | University of Cambridge                    |
| Davies         | Ryan         | Babson College                             |
| Davis          | Andrew       | Cornell University                         |
| Davis          | Jason        | Massachusetts Institute of Technology      |
| Davis-Stober   | Clinton      | University of Missouri                     |
| Dawande        | Milind       | University of Texas at Dallas              |
| Day            | Robert       | University of Connecticut                  |
| de Bettignies  | Jean-Etienne | Queen's University                         |
| de Boer        | Sanne        | New York University                        |
| De Donno       | Marzia       | Bocconi University                         |
| de Franco      | Gus          | University of Toronto                      |
| de los Santos  | Babur        | Indiana University                         |
| de Motta       | Adolfo       | McGill University                          |
| De Silva       | Dakshina     | Texas Tech University                      |
| de Vericourt   | Francis      | INSEAD                                     |
| De Waegenare   | Anja         | Tilburg University                         |
| Dean           | Mark         | Brown University                           |
| Deaves         | Richard      | McMaster University                        |
| Debo           | Laurens G.   | University of Chicago                      |
| Decarolis      | Francesco    | University of Wisconsin-Madison            |
| DeCroix        | Gregory      | University of Wisconsin-Madison            |
| DeFond         | Mark         | University of Southern California          |
| DeHoratius     | Nicole       | Zaragoza Logistics Center                  |
| Delage         | Erick        | HEC Montréal                               |
| Delmar         | Frédéric     | EMLYON Business School                     |
| DeMiguel       | Victor       | London Business School                     |
| Dencker        | John         | University of Illinois at Urbana-Champaign |
| Denrell        | Jerker       | Oxford University                          |
| Dentcheva      | Darinka      | Stevens Institute of Technology            |
| Denton         | Brian        | North Carolina State University            |
| Denuit         | Michel       | Université Catholique de Louvain           |
| Deo            | Sarang       | Northwestern University                    |
| Desaulniers    | Guy          | Ecole Polytechnique de Montréal            |
| Desiraju       | Ramarao      | University of Central Florida              |
| Dey            | Aiysha       | University of Minnesota                    |
| Dezsö          | Cristian     | University of Maryland                     |
| Di Gangi       | Paul M.      | Loyola University Maryland                 |
| Dichev         | Iliia        | Emory University                           |
| Dikolli        | Shane        | Duke University                            |
| Dimov          | Dimo         | University of Connecticut                  |
| Ding           | Waverly      | University of Maryland                     |
| Dirks          | Kurt         | Washington University in St. Louis         |
| Dittmann       | Ingolf       | Erasmus University Rotterdam               |
| Dittmar        | Robert       | University of Michigan                     |
| Doan           | Xuan Vinh    | University of Warwick                      |
| Dobson         | Greg         | University of Rochester                    |
| Dogramaci      | Ali          | Bilkent University                         |
| Doidge         | Craig        | University of Toronto                      |
| Domingo-Ferrer | Josep        | Rovira i Virgili University                |
| Dong           | Lingxiu      | Washington University in St. Louis         |
| Dooley         | Kevin        | Arizona State University                   |
| Dorn           | Daniel       | Drexel University                          |

|            |            |                                             |
|------------|------------|---------------------------------------------|
| Doshi      | Hitesh     | University of Houston                       |
| Dotson     | Jeffrey    | Vanderbilt University                       |
| Dou        | Yifan      | Tsinghua University                         |
| Dowell     | Glen       | Cornell University                          |
| Drake      | Michael S. | The Ohio State University                   |
| Dreyfus    | David      | Boston University                           |
| Dreze      | Xavier     | University of California, Los Angeles       |
| Druehl     | Cheryl     | George Mason University                     |
| Du         | Rex        | University of Houston                       |
| Duan       | Wenjing    | George Washington University                |
| Duchin     | Ran        | University of Michigan                      |
| Dudey      | Marc       | Rice University                             |
| Dufwenberg | Martin     | University of Arizona                       |
| Dukes      | Anthony    | University of Southern California           |
| Dur        | Robert     | Erasmus University Rotterdam                |
| Dushnitsky | Gary       | University of Pennsylvania                  |
| Dutta      | Kaushik    | Florida International University            |
| Duvvuri    | Sri Devi   | University at Buffalo                       |
| Easley     | Robert     | University of Notre Dame                    |
| Ebert      | Jane       | Brandeis University                         |
| Ebert      | Sebastian  | University of Bonn                          |
| Eckel      | Catherine  | University of Texas at Dallas               |
| Eckhardt   | Jonathan   | University of Wisconsin-Madison             |
| Edelen     | Roger      | University of California, Davis             |
| Edelman    | Benjamin   | Harvard University                          |
| Ederer     | Florian    | University of California, Los Angeles       |
| Edmans     | Alex       | University of Pennsylvania                  |
| Eesley     | Charles    | Stanford University                         |
| Eggers     | J.P.       | New York University                         |
| Einhorn    | Eti        | Tel Aviv University                         |
| Eisenbach  | Thomas     | Princeton University                        |
| Eisenkraft | Noah       | University of North Carolina at Chapel Hill |
| Elfenbein  | Daniel     | Washington University in St. Louis          |
| Eliaz      | Kfir       | Brown University                            |
| Ellickson  | Paul       | Duke University                             |
| Ellingsen  | Tore       | Stockholm School of Economics               |
| Elliot     | Andrew     | University of Rochester                     |
| Ellul      | Andrew     | Indiana University                          |
| Elmaghraby | Wedad      | University of Maryland                      |
| Engelmann  | Dirk       | University of Mannheim                      |
| Englmaier  | Florian    | University of Munich                        |
| Eom        | Kyong Shik | University of Seoul                         |
| Epley      | Nicholas   | University of Chicago                       |
| Epper      | Thomas     | ETH Zurich                                  |
| Epstude    | Kai        | University of Groningen                     |
| Erat       | Sanjiv     | University of California at San Diego       |
| Erenay     | Fatih      | University of Waterloo                      |
| Erev       | Ido        | Technion                                    |
| Ergun      | Ozlem      | Georgia Institute of Technology             |
| Erhun      | Feryal     | Stanford University                         |
| Eriksson   | Tor        | Aarhus University                           |
| Erkal      | Nisvan     | University of Melbourne                     |
| Ertac      | Seda       | Koc University                              |
| Ertimur    | Yonca      | Duke University                             |
| Espinosa   | Alberto    | American University                         |

|             |           |                                       |
|-------------|-----------|---------------------------------------|
| Ethiraj     | Sendil    | University of Michigan                |
| Etzion      | Hila      | University of Michigan                |
| Ewens       | Michael   | Carnegie Mellon University            |
| Fabrizio    | Kira      | Duke University                       |
| Falsetta    | Diana     | University of Miami                   |
| Fan         | Qintao    | University of California, Berkeley    |
| Fang        | Christina | New York University                   |
| Fang        | Yulin     | City University of Hong Kong          |
| Farahat     | Amr       | Washington University in St. Louis    |
| Farber      | David     | University of Missouri                |
| Farias      | Vivek     | Massachusetts Institute of Technology |
| Faro        | David     | London Business School                |
| Faulkender  | Michael   | University of Maryland                |
| Faurel      | Lucile    | University of California, Irvine      |
| Fay         | Scott     | Syracuse University                   |
| Fee         | C.        | Michigan State University             |
| Fee         | Edward    | Michigan State University             |
| Feinberg    | Fred      | University of Michigan                |
| Feld        | Scott     | Purdue University                     |
| Feldman     | Emilie    | University of Pennsylvania            |
| Feldman     | Pnina     | University of California, Berkeley    |
| Feng        | Juan      | City University of Hong Kong          |
| Feng        | Mei       | University of Pittsburgh              |
| Feng        | Qi        | University of Texas at Austin         |
| Feng        | Tianjun   | Fudan University                      |
| Ferguson    | John-Paul | Stanford University                   |
| Ferguson    | Mark      | Georgia Institute of Technology       |
| Feri        | Francesco | University of Trieste                 |
| Ferraro     | Fabrizio  | IESE Business School                  |
| Ferreira    | Daniel    | London School of Economics            |
| Ferrer      | Geraldo   | Naval Postgraduate School             |
| Fich        | Eliezer   | Drexel University                     |
| Field       | Laura     | Pennsylvania State University         |
| Filson      | Darren    | Claremont McKenna College             |
| Firth       | Michael   | Lingnan University                    |
| Fischbacher | Urs       | University of Konstanz                |
| Fisher      | Adlai     | University of British Columbia        |
| Fixson      | Sebastian | Babson College                        |
| Fleming     | Michael   | Federal Reserve Bank of New York      |
| Fok         | Dennis    | Erasmus University Rotterdam          |
| Fong        | Christina | Carnegie Mellon University            |
| Fons-Rosen  | Christian | Universitat Pompeu Fabra              |
| Forbes      | Silke     | University of California at San Diego |
| Foutz       | Natasha   | University of Virginia                |
| Franco      | April     | University of Toronto                 |
| Frank       | Douglas   | INSEAD                                |
| Frank       | Murray    | University of Minnesota               |
| Frankel     | Richard   | Washington University in St. Louis    |
| Frankort    | Hans      | City University London                |
| Frankovich  | Michael   | Massachusetts Institute of Technology |
| Frazier     | Peter     | Cornell University                    |
| Frechette   | Guillaume | New York University                   |
| Frederick   | Shane     | Yale University                       |
| Friedman    | Daniel    | University of California, Santa Cruz  |
| Frydman     | Carola    | Boston University                     |

|             |             |                                             |
|-------------|-------------|---------------------------------------------|
| Fu          | Fangjian    | Singapore Management University             |
| Furman      | Jeff        | Boston University                           |
| Fusaro      | Marc        | Arkansas Tech University                    |
| Gaechter    | Simon       | University of Nottingham                    |
| Galak       | Jeff        | Carnegie Mellon University                  |
| Galasso     | Alberto     | University of Toronto                       |
| Galichon    | Alfred      | Ecole Polytechnique                         |
| Gallego     | Guillermo   | Columbia University                         |
| Gallmeyer   | Michael     | Texas A&M University                        |
| Gal-Or      | Esther      | University of Pittsburgh                    |
| Gambardella | Alfonso     | Bocconi University                          |
| Ganco       | Martin      | University of Minnesota                     |
| Ganguli     | Jayant      | University of Cambridge                     |
| Gans        | Joshua      | University of Melbourne                     |
| Gao         | Pengjie     | University of Notre Dame                    |
| Gao         | Pingyang    | University of Chicago                       |
| Garbuio     | Massimo     | University of Sydney                        |
| Garcia      | Diego       | University of North Carolina at Chapel Hill |
| Garlappi    | Lorenzo     | University of British Columbia              |
| Garmaise    | Mark        | University of California, Los Angeles       |
| Gaule       | Patrick     | Massachusetts Institute of Technology       |
| Gaur        | Vishal      | Cornell University                          |
| Gavirneni   | Srinagesh   | Cornell University                          |
| Gawer       | Annabelle   | Imperial College London                     |
| Gelabert    | Liliana     | IE Business School                          |
| Geltner     | David       | Massachusetts Institute of Technology       |
| Gençay      | Ramazan     | Simon Fraser University                     |
| Gerchak     | Yigal       | Tel Aviv University                         |
| Geunes      | Joseph      | University of Florida                       |
| Geweke      | John        | University of Iowa                          |
| Geylani     | Tansev      | University of Pittsburgh                    |
| Ghose       | Sanjoy      | University of Wisconsin-Milwaukee           |
| Ghosh       | Suman       | Florida Atlantic University                 |
| Giambona    | Erasmus     | University of Amsterdam                     |
| Giannikos   | Christos    | Baruch College                              |
| Gibbs       | Michael     | University of Chicago                       |
| Gibson      | Cristina    | University of Western Australia             |
| Giesecke    | Kay         | Stanford University                         |
| Giglio      | Stefano     | University of Chicago                       |
| Gil         | Ricard      | University of California, Santa Cruz        |
| Gilbert     | Thomas      | University of Washington                    |
| Gilbride    | Tim         | University of Notre Dame                    |
| Gillan      | Stuart      | Texas Tech University                       |
| Gilland     | Wendell     | University of North Carolina at Chapel Hill |
| Gino        | Francesca   | Harvard University                          |
| Girotra     | Karan       | INSEAD                                      |
| Gittell     | Jody Hoffer | Brandeis University                         |
| Glaser      | Markus      | University of Konstanz                      |
| Glasserman  | Paul        | Columbia University                         |
| Gleason     | Cristi A.   | University of Iowa                          |
| Glover      | Jonathan    | Carnegie Mellon University                  |
| Gneezy      | Uri         | University of California at San Diego       |
| Gneiting    | Tilmann     | Heidelberg University                       |
| Godart      | Frederic    | INSEAD                                      |
| Godes       | David       | Harvard University                          |

|               |               |                                          |
|---------------|---------------|------------------------------------------|
| Goel          | Ankur         | Case Western Reserve University          |
| Goes          | Paulo         | University of Arizona                    |
| Goette        | Lorenz        | University of Lausanne                   |
| Goettler      | Ron           | University of Chicago                    |
| Gokpinar      | Bilal         | University College London                |
| Goldberg      | Amir          | Stanford University                      |
| Goldberg      | Linda         | Federal Reserve Bank of New York         |
| Golder        | Peter         | Dartmouth College                        |
| Goldfarb      | Avi           | University of Toronto                    |
| Goldfarb      | Brent         | University of Maryland                   |
| Goldsman      | Dave          | Georgia Institute of Technology          |
| Goldstein     | Dan           | London Business School                   |
| Golsteyn      | Bart          | Maastricht University                    |
| Goncalo       | Jack          | Cornell University                       |
| Gonzalez      | Richard       | University of Michigan                   |
| Gopal         | Anandasivam   | University of Maryland                   |
| Gopinath      | Shyam         | Northwestern University                  |
| Gordon        | Brett         | Columbia University                      |
| Gordy         | Michael       | Federal Reserve Board of Governors       |
| Gormley       | Todd          | University of Pennsylvania               |
| Gotlieb       | Joshua        | Harvard University                       |
| Gotoh         | Jun-ya        | Chuo University                          |
| Gowrisankaran | Gautam        | University of Arizona                    |
| Goyal         | Amit          | University of Lausanne                   |
| Goyal         | Manu          | University of Utah                       |
| Goyal         | Vineet        | Columbia University                      |
| Graddy        | Kathryn       | Brandeis University                      |
| Graefe        | Andreas       | Karlsruhe Institute of Technology        |
| Grant         | Julia         | Washington University in St. Louis       |
| Grasselli     | Matheus       | McMaster University                      |
| Graveline     | Jeremey       | University of Minnesota                  |
| Green         | Jeremiah      | Pennsylvania State University            |
| Greenstein    | Shane         | Northwestern University                  |
| Grennan       | Matthew       | University of Toronto                    |
| Greve         | Henrich       | INSEAD                                   |
| Griffin       | Paul          | University of California, Davis          |
| Grigoriev     | Alexander     | Maastricht University                    |
| Grinstein     | Yaniv         | Cornell University                       |
| Groenevelt    | Harry         | University of Rochester                  |
| Grosskopf     | Shawna        | Oregon State University                  |
| Gruber        | Marc          | Ecole Polytechnique Fédérale de Lausanne |
| Grullon       | Gustavo       | Rice University                          |
| Gu            | Bin           | University of Texas at Austin            |
| Gu            | Zhaoyang      | University of Minnesota                  |
| Gu            | Zheyin (Jane) | University at Albany                     |
| Gualandi      | Stefano       | University of Pavia                      |
| Guasoni       | Paolo         | Boston University                        |
| Guay          | Wayne         | University of Pennsylvania               |
| Gue           | Kevin         | Auburn University                        |
| Guedj         | Ilan          | Securities Litigation & Consulting Group |
| Guide, Jr.    | V. Daniel R.  | Pennsylvania State University            |
| Gulati        | Ranjay        | Harvard University                       |
| Gulen         | Huseyin       | Purdue University                        |
| Gumus         | Mehmet        | McGill University                        |
| Gunes         | Evrin         | Koc University                           |

|             |             |                                                |
|-------------|-------------|------------------------------------------------|
| Guo         | Liang       | Hong Kong University of Science and Technology |
| Guo         | Pengfei     | Hong Kong Polytechnic University               |
| Gupta       | Shubham     | Massachusetts Institute of Technology          |
| Gupta       | Sudheer     | Simon Fraser University                        |
| Gupta       | Sunil       | Harvard University                             |
| Gurnani     | Haresh      | University of Miami                            |
| Gurvich     | Itai        | Northwestern University                        |
| Guttman     | Ilan        | Stanford University                            |
| Ha          | Albert      | Hong Kong University of Science and Technology |
| Haas        | Martine     | University of Pennsylvania                     |
| Hadar       | Liat        | IDC Herzliya                                   |
| Hadlock     | Charles     | Michigan State University                      |
| Haefliger   | Stefan      | ETH Zurich                                     |
| Hail        | Luzi        | University of Pennsylvania                     |
| Halgin      | Dan         | University of Kentucky                         |
| Hambly      | Ben         | University of Oxford                           |
| Hambrick    | Donald      | Pennsylvania State University                  |
| Hamilton    | Barton      | Washington University in St. Louis             |
| Hampshire   | Robert      | Princeton University                           |
| Han         | Bing        | University of Texas at Austin                  |
| Han         | Kunsoo      | McGill University                              |
| Hansen      | Karsten     | University of California at San Diego          |
| Hardie      | Bruce       | London Business School                         |
| Harford     | Jarrad      | University of Washington                       |
| Harhoff     | Dietmar     | University of Munich                           |
| Harle       | Christopher | University of Florida                          |
| Harris      | Michael     | Indiana University                             |
| Harsha      | Pavithra    | Massachusetts Institute of Technology          |
| Hartline    | Jason       | Northwestern University                        |
| Hartmann    | Wesley      | Stanford University                            |
| Haruvy      | Ernan       | University of Texas at Dallas                  |
| Hasan       | Sharique    | Stanford University                            |
| Hasija      | Sameer      | INSEAD                                         |
| Hassin      | Refael      | Tel Aviv University                            |
| Haugh       | Martin      | Columbia University                            |
| Hautsch     | Nikolaus    | Humboldt University                            |
| Haviv       | Moshe       | Hebrew University of Jerusalem                 |
| Haw         | In-mu       | Texas Christian University                     |
| He          | Chuan       | University of Colorado at Boulder              |
| He          | Simai       | City University of Hong Kong                   |
| He          | Xiuli       | University of North Carolina at Charlotte      |
| He          | Xuedong     | Columbia University                            |
| He          | Zhiguo      | University of Chicago                          |
| Healy       | Paul        | The Ohio State University                      |
| Hedstrom    | Peter       | University of Oxford                           |
| Heese       | Hans        | Indiana University                             |
| Hegde       | Deepak      | New York University                            |
| Hege        | Ulrich      | HEC Paris                                      |
| Heinemann   | Frank       | Technische Universitat Berlin                  |
| Hellmann    | Thomas      | University of British Columbia                 |
| Hemmer      | Thomas      | Rice University                                |
| Hendershott | Terrence    | University of California, Berkeley             |
| Henderson   | Brian       | George Washington University                   |

|              |           |                                                |
|--------------|-----------|------------------------------------------------|
| Henderson    | Vicky     | University of Oxford                           |
| Hendricks    | Kevin     | Wilfrid Laurier University                     |
| Henisz       | Witold    | University of Pennsylvania                     |
| Herrmann     | Philipp   | University of Paderborn                        |
| Hertel       | Guido     | University of Münster                          |
| Hertzel      | Michael   | Arizona State University                       |
| Hervas-Drane | Andres    | Universitat Pompeu Fabra                       |
| Herz         | Holger    | Harvard University                             |
| Heston       | Steven    | University of Maryland                         |
| Heukamp      | Franz     | IESE Business School                           |
| Higle        | Julie     | The Ohio State University                      |
| Hilary       | Gilles    | Hong Kong University of Science and Technology |
| Hill         | Shawndra  | University of Pennsylvania                     |
| Hinz         | Oliver    | Goethe University Frankfurt                    |
| Hitsch       | Guenter   | University of Chicago                          |
| Hochberg     | Yael      | Northwestern University                        |
| Hodder       | Leslie    | Indiana University                             |
| Hoetker      | Glenn     | University of Illinois at Urbana-Champaign     |
| Hofmann      | Christian | University of Munich                           |
| Hommes       | Cars      | University of Amsterdam                        |
| Hong         | Jeff      | Hong Kong University of Science and Technology |
| Honhon       | Dorothee  | University of Texas at Austin                  |
| Hora         | Manpreet  | Georgia Institute of Technology                |
| Hora         | Stephen   | University of Southern California              |
| Horst        | Ulrich    | Humboldt University                            |
| Hosanagar    | Kartik    | University of Pennsylvania                     |
| Hossain      | Tanjim    | University of Toronto                          |
| Hotchkiss    | Edith     | Boston College                                 |
| Hou          | Kewei     | The Ohio State University                      |
| Houser       | Daniel    | George Mason University                        |
| Hribar       | Paul      | University of Iowa                             |
| Hsiao        | Rueylin   | National Chengchi University                   |
| Hsieh        | JJ Po-An  | Hong Kong Polytechnic University               |
| Hu           | Bin       | University of North Carolina at Chapel Hill    |
| Hu           | Ming      | University of Toronto                          |
| Hu           | Xinxin    | Indiana University                             |
| Hu           | Yu        | Purdue University                              |
| Huang        | Kenneth   | Singapore Management University                |
| Huang        | Peng      | University of Maryland                         |
| Huang        | Rong      | Baruch College                                 |
| Huang        | Xiao      | Concordia University                           |
| Huang        | Zan       | Pennsylvania State University                  |
| Huber        | Joel      | Duke University                                |
| Huber        | Juergen   | University of Innsbruck                        |
| Huberman     | Bernardo  | HP Labs                                        |
| Huckman      | Robert    | Harvard University                             |
| Huesch       | Marco     | Duke University                                |
| Huffman      | David     | Swarthmore College                             |
| Hui          | Sam       | New York University                            |
| Hung         | Mingyi    | University of Southern California              |
| Hurkens      | Sjaak     | Spanish Council for Scientific Research        |
| Hutchinson   | Wes       | University of Pennsylvania                     |
| Hutton       | David     | University of Michigan                         |

|              |              |                                           |
|--------------|--------------|-------------------------------------------|
| Huy          | Quy          | INSEAD                                    |
| Hvidkjaer    | Soeren       | Copenhagen Business School                |
| Hwang        | Byoung-Hyoun | Purdue University                         |
| Hyndman      | Kyle         | Southern Methodist University             |
| Hyytinen     | Ari          | University of Jyvaskyla                   |
| Iancu        | Dan          | Stanford University                       |
| Iizuka       | Toshiaki     | University of Tokyo                       |
| Illeditsch   | Philipp      | University of Pennsylvania                |
| Innocenti    | Alessandro   | University of Siena                       |
| Ipeiritis    | Panagiotis   | New York University                       |
| Iriberry     | Nagore       | Universitat Pompeu Fabra                  |
| Irlenbusch   | Bernd        | University of Cologne                     |
| Ishihara     | Masakazu     | New York University                       |
| Ivashina     | Victoria     | Harvard University                        |
| Iyengar      | Raghuram     | University of Pennsylvania                |
| Jackwerth    | Jens         | University of Konstanz                    |
| Jacobs       | Kris         | McGill University                         |
| Jagannathan  | Ravi         | Northwestern University                   |
| Jagolinzer   | Alan         | University of Colorado at Boulder         |
| Jain         | Amit         | National University of Singapore          |
| Jain         | Nitish       | INSEAD                                    |
| Jain         | Sanjay       | Texas A&M University                      |
| Janakiraman  | Ganesh       | University of Texas at Dallas             |
| Janakiraman  | Ramkumar     | Texas A&M University                      |
| Janakiraman  | Surya        | University of Texas at Dallas             |
| Jap          | Sandy        | Emory University                          |
| Jedidi       | Kamel        | Columbia University                       |
| Jensen       | Michael      | University of Michigan                    |
| Jerath       | Kinshuk      | Carnegie Mellon University                |
| Jeyaraj      | Anand        | Wright State University                   |
| Ji           | Yonghua      | University of Alberta                     |
| Jiang        | Li           | Hong Kong Polytechnic University          |
| Jiang        | Renna        | University of California, Davis           |
| Jin          | Ginger       | University of Maryland                    |
| Jin          | Li           | Harvard University                        |
| Jin          | Xing         | University of Warwick                     |
| Jing         | Bing         | Cheung Kong Graduate School of Business   |
| Johannesson  | Magnus       | Stockholm School of Economics             |
| Johar        | Monica       | University of North Carolina at Charlotte |
| Johnson      | Edward       | none                                      |
| Johnson      | Eric         | Columbia University                       |
| Johnson      | Erin         | Massachusetts Institute of Technology     |
| Johnson      | Justin       | Cornell University                        |
| Johnson      | Nicole       | University of California, Berkeley        |
| Johnson      | Scott        | Oklahoma State University                 |
| Johnson      | Shane        | Texas A&M University                      |
| Johnson      | Steven       | Temple University                         |
| Jose         | Victor       | Georgetown University                     |
| Joseph       | John         | Duke University                           |
| Joshi        | Amit         | University of Central Florida             |
| Joshi        | Yogesh       | University of Maryland                    |
| Jylha        | Petri        | Aalto University                          |
| Kacperczyk   | Marcin       | New York University                       |
| Kadlec       | Gregory      | Virginia Tech                             |
| Kadyrzhanova | Dalida       | University of Maryland                    |

|               |             |                                                |
|---------------|-------------|------------------------------------------------|
| Kagel         | John        | The Ohio State University                      |
| Kahl          | Steven      | University of Chicago                          |
| Kahle         | Kathleen    | University of Arizona                          |
| Kaiser        | Ulrich      | University of Zurich                           |
| Kalnins       | Arturs      | Cornell University                             |
| Kamenica      | Emir        | University of Chicago                          |
| Kamstra       | Mark        | York University                                |
| Kan           | Raymond     | University of Toronto                          |
| Kane          | Gerald      | Boston College                                 |
| Kang          | Min         | University of California, Berkeley             |
| Kannan        | P.K.        | University of Maryland                         |
| Kanodia       | Chandra     | University of Minnesota                        |
| Karaesmen     | Itir        | American University                            |
| Karim         | Samina      | Boston University                              |
| Karpoff       | Jonathan    | University of Washington                       |
| Kartasheva    | Anastasia   | University of Pennsylvania                     |
| Kasznik       | Ron         | Stanford University                            |
| Kathuria      | Abishek     | Emory University                               |
| Katok         | Elena       | Pennsylvania State University                  |
| Katona        | Zsolt       | University of California, Berkeley             |
| Katsamakos    | Evangelos   | Fordham University                             |
| Kattuman      | Paul        | University of Cambridge                        |
| Kaul          | Aseem       | University of Minnesota                        |
| Kazaz         | Burak       | Syracuse University                            |
| KC            | Diwas       | Emory University                               |
| Kedia         | Simi        | Rutgers University                             |
| Keil          | Mark        | Georgia State University                       |
| Keller        | L. Robin    | University of California, Irvine               |
| Keppo         | Jussi       | University of Michigan                         |
| Kerr          | William     | Harvard University                             |
| Kerschbamer   | Rudolf      | University of Innsbruck                        |
| Kesavan       | Saravanan   | University of North Carolina at Chapel Hill    |
| Keskin        | N. Bora     | Stanford University                            |
| Khaliq        | Abdul       | Middle Tennessee State University              |
| Khan          | Mozaffar    | University of Minnesota                        |
| Khanna        | Naveen      | Michigan State University                      |
| Khessina      | Olga        | Cornell University                             |
| Khimich       | Natalya     | University of California, Berkeley             |
| Kilinc Karzan | Fatma       | Georgia Institute of Technology                |
| Kim           | Byung Cho   | Virginia Tech                                  |
| Kim           | Harrison M. | University of Illinois at Urbana-Champaign     |
| Kim           | Jiyub       | INSEAD                                         |
| Kim           | Jun         | Georgia Institute of Technology                |
| Kim           | Sang-Hyun   | Yale University                                |
| Kim           | Wonjoon     | KAIST                                          |
| Kim           | Yongsuk     | Hong Kong University of Science and Technology |
| King          | Andrew      | Dartmouth College                              |
| Kirby         | Chris       | Clemson University                             |
| Kirchler      | Michael     | University of Innsbruck                        |
| Klabjan       | Diego       | Northwestern University                        |
| Klein         | April       | New York University                            |
| Klepper       | Steve       | Carnegie Mellon University                     |
| Klijin        | Flip        | Spanish Council for Scientific Research        |
| Klos          | Alexander   | University of Kiel                             |

|                     |            |                                             |
|---------------------|------------|---------------------------------------------|
| Kluger              | Brian      | University of Cincinnati                    |
| Knott               | Anne Marie | Washington University in St. Louis          |
| Knudsen             | Thorbjorn  | University of Southern Denmark              |
| Knyazeva            | Anzhela    | University of Rochester                     |
| Koch                | Alexander  | Aarhus University                           |
| Kocher              | Martin     | University of Munich                        |
| Koellinger          | Philipp D. | Erasmus University Rotterdam                |
| Koenigsberg         | Oded       | Columbia University                         |
| Kogut               | Bruce      | Columbia University                         |
| Kok                 | Gurhan     | Duke University                             |
| Kolay               | Sreya      | University of California, Irvine            |
| Kominers            | Scott      | Harvard University                          |
| Konana              | Prabudev   | University of Texas at Austin               |
| Konigstein          | Manfred    | University of Erfurt                        |
| Kor                 | Yaseminy   | University of South Carolina                |
| Kornish             | Laura      | University of Colorado at Boulder           |
| Kosova              | Renata     | Cornell University                          |
| Kostamis            | Dimitris   | University of North Carolina at Chapel Hill |
| Koster              | Arie       | RWTH Aachen University                      |
| Kovacs              | Balazs     | University of Lugano                        |
| Kraiselburd         | Santiago   | Zaragoza Logistics Center                   |
| Kramer              | Lisa       | University of Toronto                       |
| Kremer              | Mirko      | Pennsylvania State University               |
| Krepely Pool        | Veronika   | Indiana University                          |
| Kretschmer          | Tobias     | University of Munich                        |
| Krishnan            | Harish     | University of British Columbia              |
| Krishnan            | Trichy     | National University of Singapore            |
| Krupka              | Erin       | University of Michigan                      |
| Ku                  | Gillian    | London Business School                      |
| Kube                | Sebastian  | University of Bonn                          |
| Kuhn                | Daniel     | Imperial College London                     |
| Kuhnen              | Camelia    | Northwestern University                     |
| Kuksov              | Dmitri     | Washington University in St. Louis          |
| Kumar               | Alok       | University of Texas at Austin               |
| Kumar               | Anuj       | University of Florida                       |
| Kumar               | Nanda      | University of Texas at Dallas               |
| Kumar               | Subodha    | Texas A&M University                        |
| Kumar               | Vineet     | Harvard University                          |
| Kurtulus            | Mumin      | Vanderbilt University                       |
| Kuruzovich          | Jason      | Rensselaer Polytechnic Institute            |
| Kwasnica            | Anthony    | Pennsylvania State University               |
| Lacetera            | Nicola     | University of Toronto                       |
| Lahiri              | Atanu      | University of Washington                    |
| Lahiri              | Nandini    | University of North Carolina at Chapel Hill |
| Lai                 | Guoming    | University of Texas at Austin               |
| Lai                 | Richard    | University of Pennsylvania                  |
| Lai                 | Tze Leung  | Stanford University                         |
| Lakhani             | Karim      | Harvard University                          |
| Lambert-Mogiliansky | Ariane     | Paris School of Economics                   |
| Lambrecht           | Anja       | London Business School                      |
| Lan                 | Hai        | Shanghai Jiao Tong University               |
| Lanen               | Bill       | University of Michigan                      |
| Langer              | Nishtha    | Indian School of Business                   |
| Langer              | Thomas     | University of Münster                       |
| Lanzolla            | Gianvito   | City University London                      |

|            |                 |                                              |
|------------|-----------------|----------------------------------------------|
| Lariviere  | Martin          | Northwestern University                      |
| Larkin     | Ian             | Harvard University                           |
| Larrick    | Richard         | Duke University                              |
| Larson     | Chad            | Washington University in St. Louis           |
| Larsson    | Elizabeth       | Uppsala University                           |
| Lasserre   | Jean Bernard    | Centre National de la Recherche Scientifique |
| Lau        | Nelson          | INSEAD                                       |
| Lauga      | Dominique       | University of California at San Diego        |
| Laux       | Volker          | University of Texas at Austin                |
| Lavie      | Dovev           | Technion                                     |
| Lazrak     | Ali             | University of British Columbia               |
| Le Mens    | Gael            | Universitat Pompeu Fabra                     |
| Leary      | Mark            | Cornell University                           |
| Lederman   | Mara            | University of Toronto                        |
| Ledvina    | Andrew          | Princeton University                         |
| Lee        | Chi-Hyon        | George Mason University                      |
| Lee        | Eunkyu          | Syracuse University                          |
| Lee        | Jeongsik        | Georgia Institute of Technology              |
| Lee        | Jooeun          | Stanford University                          |
| Lee        | Sang-yong Tom   | Hanyang University                           |
| Lee        | Tae-Hwy         | University of California, Riverside          |
| Lehar      | Alfred          | University of Calgary                        |
| Leheavy    | Reuven          | University of Michigan                       |
| Lei        | Qin             | Southern Methodist University                |
| Leiblein   | Michael         | The Ohio State University                    |
| Leider     | Stephen         | University of Michigan                       |
| Leiponen   | Aija            | Imperial College London                      |
| Lemmon     | Michael         | University of Utah                           |
| Lenk       | Peter           | University of Michigan                       |
| Leroy      | Sophie          | University of Minnesota                      |
| Lescourret | Laurence        | ESSEC                                        |
| Lesmond    | David           | Tulane University                            |
| Leuven     | Edwin           | CREST (ENSAE)                                |
| Leverly    | J.              | University of Iowa                           |
| Levesque   | Moren           | York University                              |
| Levine     | David           | Washington University in St. Louis           |
| Levitt     | Steven          | University of Chicago                        |
| Lewis      | Mark            | Cornell University                           |
| l'Haridon  | Olivier         | University of Paris 1-Panthéon Sorbonne      |
| Li         | Beibei          | New York University                          |
| Li         | Cuihong         | University of Connecticut                    |
| Li         | Dongmei         | University of California at San Diego        |
| Li         | Feng            | University of Michigan                       |
| Li         | Haitao          | University of Michigan                       |
| Li         | Jun             | University of Pennsylvania                   |
| Li         | Kai             | University of British Columbia               |
| Li         | Oliver          | National University of Singapore             |
| Li         | Shanling        | McGill University                            |
| Li         | Sherry          | University of Texas at Dallas                |
| Li         | Shibo           | Indiana University                           |
| Li         | Tao             | City University of Hong Kong                 |
| Li         | Xiao-Bai        | University of Massachusetts Lowell           |
| Li         | Xiaotong        | University of Alabama                        |
| Li         | Xinxin          | University of Connecticut                    |
| Liang      | Pierre Jinghong | Carnegie Mellon University                   |

|              |                 |                                                |
|--------------|-----------------|------------------------------------------------|
| Liaukonyte   | Jura            | Cornell University                             |
| Libby        | Theresa         | University of Waterloo                         |
| LiCalzi      | Marco           | University of Venice                           |
| Lichtenstein | Benyamin        | University of Massachusetts Boston             |
| Lieberman    | Marvin          | University of California, Los Angeles          |
| Liechty      | John            | Pennsylvania State University                  |
| Lim          | Andrew          | University of California, Berkeley             |
| Lim          | Noah            | University of Wisconsin-Madison                |
| Lim          | W. S.           | National University of Singapore               |
| Lin          | Mingfeng        | University of Arizona                          |
| Lin          | Tse-Chun        | University of Hong Kong                        |
| Lin          | Yuanfang        | University of Alberta                          |
| Linderman    | Kevin           | University of Minnesota                        |
| Lindsey      | Laura           | Arizona State University                       |
| Linnainmaa   | Juhani          | University of Chicago                          |
| Litov        | Lubomir         | Washington University in St. Louis             |
| Liu          | Andrew          | Purdue University                              |
| Liu          | Chengwei        | University of Cambridge                        |
| Liu          | Chris           | University of Toronto                          |
| Liu          | De              | University of Kentucky                         |
| Liu          | Dengpan         | University of Alabama                          |
| Liu          | Hong            | Washington University in St. Louis             |
| Liu          | Jingchen        | Columbia University                            |
| Liu          | Laura           | Hong Kong University of Science and Technology |
| Liu          | Nan             | Columbia University                            |
| Liu          | Qian            | Hong Kong University of Science and Technology |
| Liu          | Qianqiu         | University of Hawaii                           |
| Liu          | Tracy           | University of Michigan                         |
| Liu          | Yong            | University of Arizona                          |
| Liu          | Yu-Jane         | Peking University                              |
| Liu          | Yunchuan        | University of Illinois at Urbana-Champaign     |
| Liu          | Zhixin          | University of Michigan                         |
| Livdan       | Dmitry          | University of California, Berkeley             |
| Livingston   | Jeffrey         | Bentley University                             |
| Llanes       | Gaston          | Pontificia Universidad Católica de Chile       |
| Lo           | Andrew          | Massachusetts Institute of Technology          |
| Lo           | Kin             | University of British Columbia                 |
| Lobel        | Ilan            | New York University                            |
| Lobo         | Miguel          | INSEAD                                         |
| Lochstoer    | Lars            | Columbia University                            |
| Lodree       | Emmett          | University of Alabama                          |
| Loewenstein  | Mark            | University of Maryland                         |
| Lomi         | Alessandro      | University of Lugano                           |
| Long         | Elisa           | Yale University                                |
| Lopes        | Hedibert        | University of Chicago                          |
| Lou          | Xiaoxia         | University of Delaware                         |
| Lovett       | Mitch           | University of Rochester                        |
| Lowery       | J.              | University of Texas at Austin                  |
| Lu           | Lauren Xiaoyuan | University of North Carolina at Chapel Hill    |
| Lu           | Yina            | Columbia University                            |
| Luce         | Duncan          | University of California, Irvine               |
| Ludkovski    | Michael         | University of Michigan                         |
| Luo          | Hong            | Harvard University                             |

|                     |             |                                                |
|---------------------|-------------|------------------------------------------------|
| Luo                 | Jiang       | Nanyang Technological University               |
| Luo                 | Lan         | University of Southern California              |
| Luo                 | Xueming     | University of Texas at Arlington               |
| Lyons               | Elizabeth   | University of Toronto                          |
| Maafi               | Hela        | University of Paris 1-Panthéon Sorbonne        |
| MacCormack          | Alan        | Massachusetts Institute of Technology          |
| MacCroy             | Francis     | University of California, Irvine               |
| MacGarvie           | Megan       | Boston University                              |
| Maciejovsky         | Boris       | Imperial College London                        |
| Macpherson          | Muir        | Georgetown University                          |
| Madrian             | Brigitte    | Harvard University                             |
| Madsen              | Peter       | Brigham Young University                       |
| Mahmood             | Ishtiaq     | National University of Singapore               |
| Maier               | Johannes    | University of Munich                           |
| Makadok             | Richard     | Emory University                               |
| Makarov             | Igor        | London Business School                         |
| Malamud             | Semyon      | Ecole Polytechnique Fédérale de Lausanne       |
| Malinova            | Katya       | University of Toronto                          |
| Malloy              | Christopher | Harvard University                             |
| Mamani              | Hamed       | University of Washington                       |
| Manchanda           | Puneet      | University of Michigan                         |
| Mandel              | Benjamin    | Federal Reserve Board of Governors             |
| Manela              | Asaf        | Washington University in St. Louis             |
| Mani                | Deepa       | Indian School of Business                      |
| Manigart            | Sophie      | Vlerick Leuven Gent Management School          |
| Mannor              | Shie        | Technion                                       |
| Manso               | Gustavo     | Massachusetts Institute of Technology          |
| Mantena             | Ravindra    | University of Rochester                        |
| Mantrala            | Murali      | University of Missouri                         |
| Marechal            | Michel      | University of Zurich                           |
| Marengo             | Luigi       | Scuola Superiore Sant'Anna                     |
| Marinesi            | Simone      | INSEAD                                         |
| Markle              | Alex        | Hong Kong University of Science and Technology |
| Marom               | Ori         | Erasmus University Rotterdam                   |
| Marschke            | Gerry       | University at Albany                           |
| Martin              | Daniel      | New York University                            |
| Martinez de Albeniz | Victor      | IESE Business School                           |
| Martinez Jerez      | F. Asis     | Harvard University                             |
| Martínez-de-Albéniz | Victor      | IESE Business School                           |
| Maruping            | Likoebe     | University of Louisville                       |
| Marx                | Matt        | Massachusetts Institute of Technology          |
| Masatlioglu         | Yusufcan    | University of Michigan                         |
| Massa               | Massimo     | INSEAD                                         |
| Massey              | Cade        | Yale University                                |
| Mastrobuoni         | Giovanni    | Collegio Carlo Alberto                         |
| Matsa               | David       | Northwestern University                        |
| Mayer               | Kyle        | University of Southern California              |
| Mayew               | Bill        | Duke University                                |
| Mayzlin             | Dina        | Yale University                                |
| Mazar               | Nina        | University of Toronto                          |
| McCann              | Brian       | Vanderbilt University                          |
| McConnell           | Margaret    | Harvard University                             |
| McDonald            | Robert      | Northwestern University                        |
| McFadyen            | Ann         | University of Texas at Arlington               |

|               |            |                                             |
|---------------|------------|---------------------------------------------|
| McGill        | Jeff       | Queen's University                          |
| McGraw        | A. Peter   | University of Colorado at Boulder           |
| McInnis       | John       | University of Texas at Austin               |
| McKelvey      | Bill       | University of California, Los Angeles       |
| Mead          | Nicole     | Tilburg University                          |
| Mehra         | Amit       | Indian School of Business                   |
| Mehrotra      | Anuj       | University of Miami                         |
| Mehta         | Nitin      | University of Toronto                       |
| Meier         | Stephan    | Columbia University                         |
| Mela          | Carl       | Duke University                             |
| Mellers       | Barbara    | University of California, Berkeley          |
| Mendenhall    | Richard    | University of Notre Dame                    |
| Meng          | Xiaojing   | New York University                         |
| Menon         | Nirup      | George Mason University                     |
| Menon         | Syam       | University of Texas at Dallas               |
| Mersereau     | Adam       | University of North Carolina at Chapel Hill |
| Messinger     | Paul       | University of Alberta                       |
| Metzger       | Daniel     | Stockholm School of Economics               |
| Michaely      | Roni       | Cornell University                          |
| Midgley       | David      | INSEAD                                      |
| Mihm          | Jurgen     | INSEAD                                      |
| Miklós-Thal   | Jeanine    | University of Rochester                     |
| Milbourn      | Todd       | Washington University in St. Louis          |
| Miller        | Amalia     | University of Virginia                      |
| Miller        | Darius     | Southern Methodist University               |
| Miller        | Kent       | Michigan State University                   |
| Mills         | Lillian    | University of Texas at Austin               |
| Milner        | Joseph     | University of Toronto                       |
| Mingo         | Santiago   | University of Miami                         |
| Mishra        | Abhay      | Georgia State University                    |
| Mishra        | Sanjay     | University of Kansas                        |
| Misra         | Kanishka   | London Business School                      |
| Mitchell      | Matthew    | University of Toronto                       |
| Mithas        | Sunil      | University of Maryland                      |
| Mitra         | Debanjan   | University of Florida                       |
| Mitra         | Sabyasachi | Georgia Institute of Technology             |
| Mittal        | Vikas      | Rice University                             |
| Mittendorf    | Brian      | The Ohio State University                   |
| Moallemi      | Ciamac     | Columbia University                         |
| Moe           | Wendy      | University of Maryland                      |
| Moehring      | Rolf       | Technische Universitat Berlin               |
| Moers         | Frank      | Maastricht University                       |
| Moinas        | Sophie     | Toulouse School of Economics                |
| Mollick       | Ethan      | University of Pennsylvania                  |
| Monahan       | Steven     | INSEAD                                      |
| Mondria       | Jordi      | University of North Carolina at Chapel Hill |
| Monteiro      | Felipe     | University of Pennsylvania                  |
| Montes        | Maria      | Universidad Carlos III de Madrid            |
| Montgomery    | Alan       | Carnegie Mellon University                  |
| Montibeller   | Gilberto   | London School of Economics                  |
| Moore         | Michael    | Queen's University Belfast                  |
| Moreau        | Page       | University of Colorado at Boulder           |
| Moreno        | Toni       | University of Pennsylvania                  |
| Moreno-Garcia | Antonio    | Northwestern University                     |
| Morewedge,    | carey      | Carnegie Mellon University                  |

|              |           |                                                |
|--------------|-----------|------------------------------------------------|
| Moritz       | Brent     | Pennsylvania State University                  |
| Mortal       | Sandra    | University of Memphis                          |
| Moulton      | Pamela    | Cornell University                             |
| Mouw         | Ted       | University of North Carolina at Chapel Hill    |
| Muchnik      | Lev       | New York University                            |
| Muharremoglu | Alp       | Columbia University                            |
| Mukherjee    | Sumitra   | Nova Southeastern University                   |
| Muller       | Eitan     | New York University                            |
| Munger       | David     | University of Montreal                         |
| Muravyev     | Dmitriy   | University of Illinois at Urbana-Champaign     |
| Murphy       | Ryan      | ETH Zurich                                     |
| Murthi       | B. P. S.  | University of Texas at Dallas                  |
| Musalem      | Andres    | Duke University                                |
| Muter        | Ibrahim   | Sabanci University                             |
| Muthulingam  | Suresh    | Cornell University                             |
| Myers        | James     | University of Arkansas                         |
| Nagar        | Venky     | University of Michigan                         |
| Nagarajan    | Mahesh    | University of British Columbia                 |
| Naik         | Prasad    | University of California, Davis                |
| Nair         | Harikesh  | Stanford University                            |
| Nanda        | Dhananjay | University of Miami                            |
| Nanda        | Ramana    | Harvard University                             |
| Nandkumar    | Anand     | Indian School of Business                      |
| Naoum-Sawaya | Joe       | University of Waterloo                         |
| Narasimhan   | Om        | University of Minnesota                        |
| Narayan      | Vishal    | Cornell University                             |
| Narayanan    | Sridhar   | Stanford University                            |
| Narayanan    | Sriram    | Michigan State University                      |
| Nasiry       | Javad     | INSEAD                                         |
| Nasr         | Nada      | Bentley University                             |
| Nasser       | Sherif    | Washington University in St. Louis             |
| Natarajan    | Karthik   | National University of Singapore               |
| Natividad    | Gabriel   | New York University                            |
| Natter       | Martin    | Goethe University Frankfurt                    |
| Naveen       | Lalitha   | Temple University                              |
| Nazerzadeh   | Hamid     | University of Southern California              |
| Nediak       | Mikhail   | Queen's University                             |
| Negro        | Giacomo   | Emory University                               |
| Nelson       | Barry     | Northwestern University                        |
| Nembhard     | David     | Pennsylvania State University                  |
| Nembhard     | Ingrid    | Yale University                                |
| Neslin       | Scott     | Dartmouth College                              |
| Netessine    | Serguei   | INSEAD                                         |
| Netzer       | Oded      | Columbia University                            |
| Nezlobin     | Alexander | New York University                            |
| Ng           | David     | Cornell University                             |
| Ni           | Sophie    | Hong Kong University of Science and Technology |
| Nickerson    | Jackson   | Washington University in St. Louis             |
| Niculescu    | Marius    | Georgia Institute of Technology                |
| Nikolaev     | Valeri    | University of Chicago                          |
| Nikolowa     | Radoslaw  | Queen Mary University of London                |
| Nino-Mora    | Jose      | Universidad Carlos III de Madrid               |
| Niraj        | Rakesh    | Case Western Reserve University                |
| Noe          | Thomas    | University of Oxford                           |

|                    |            |                                                    |
|--------------------|------------|----------------------------------------------------|
| Noor               | Jawwad     | Boston University                                  |
| Norden             | Lars       | Erasmus University Rotterdam                       |
| Norton             | Michael    | Harvard University                                 |
| Novaes             | Walter     | Pontifícia Universidade Católica do Rio de Janeiro |
| Novemsky           | Nathan     | Yale University                                    |
| Nunez              | Manuel     | University of Connecticut                          |
| Nyborg             | Kjell      | University of Zurich                               |
| O' Hiar            | Allison    | Massachusetts Institute of Technology              |
| Oberholzer-Gee     | Felix      | Harvard University                                 |
| Oemke              | Martin     | Columbia University                                |
| Oestreicher-Singer | Gal        | Tel Aviv University                                |
| Oetl               | Alexander  | Georgia Institute of Technology                    |
| Olivares           | Marcelo    | Columbia University                                |
| Olsen              | Tava       | University of Auckland                             |
| O'Mahony           | Siobhan    | Boston University                                  |
| Oprea              | Ryan       | University of California, Santa Cruz               |
| Oraiopoulos        | Nektarios  | Cambridge University                               |
| Orhun              | A. Yesim   | University of Chicago                              |
| Ornaghi            | Carmine    | University of Southampton                          |
| Ortiz-Molina       | Hernan     | University of British Columbia                     |
| Ortmann            | Andreas    | University of New South Wales                      |
| Osadchiy           | Nikolay    | Emory University                                   |
| Ostdiek            | Barbra     | Rice University                                    |
| Ostling            | Robert     | Stockholm University                               |
| Ostrovsky          | Michael    | Stanford University                                |
| Otter              | Thomas     | Goethe University Frankfurt                        |
| Ovchinnikov        | Anton      | University of Virginia                             |
| Overby             | Eric       | Georgia Institute of Technology                    |
| Owens              | Edward     | University of Rochester                            |
| Ozbas              | Oguzhan    | University of Southern California                  |
| Ozdenoren          | Emre       | London Business School                             |
| Ozman              | Muge       | Institut Telecom                                   |
| Ozsoylev           | Han        | University of Oxford                               |
| Pachamanova        | Dessislava | Babson College                                     |
| Padgett            | John       | University of Chicago                              |
| Padmanabhan        | Balaji     | University of South Florida                        |
| Page               | Lionel     | Queensland University of Technology                |
| Page               | Scott      | University of Michigan                             |
| Pai                | Mallesh    | University of Pennsylvania                         |
| Paik               | Yongwook   | University of Southern California                  |
| Palazzo            | Berardino  | Boston University                                  |
| Palia              | Darius     | Rutgers University                                 |
| Pancs              | Romans     | Stanford University                                |
| Pang               | Min-Seok   | George Mason University                            |
| Pang               | Zhan       | Lancaster University                               |
| Panico             | Claudio    | Bocconi University                                 |
| Papachristos       | Andrew     | University of Massachusetts Amherst                |
| Park               | James      | University of Pennsylvania                         |
| Park               | Minjung    | University of California, Berkeley                 |
| Park               | Young-Hoon | Cornell University                                 |
| Parker             | Geoffrey   | Tulane University                                  |
| Parker             | Rodney     | University of Chicago                              |
| Paserman           | Daniele    | Boston University                                  |
| Pasquariello       | Paolo      | University of Michigan                             |

|               |                 |                                            |
|---------------|-----------------|--------------------------------------------|
| Pavlou        | Paul            | Temple University                          |
| Pearson       | Neil            | University of Illinois at Urbana-Champaign |
| Pekec         | Aleksandar Saša | Duke University                            |
| Pelletier     | Denis           | North Carolina State University            |
| Pena          | Javier          | Carnegie Mellon University                 |
| Peng          | Lin             | Baruch College                             |
| Penner        | Andrew          | University of California, Irvine           |
| Perdikaki     | Olga            | Texas A&M University                       |
| Peress        | Michael         | University of Rochester                    |
| Perry         | David           | University of Haifa                        |
| Persson       | Lars            | Research Institute of Industrial Economics |
| Pesch         | Erwin           | University of Siegen                       |
| Petkova       | Ralitsa         | Texas A&M University                       |
| Pfeiffer      | Thomas          | University of Vienna                       |
| Phalippou     | Ludo            | University of Oxford                       |
| Phillips      | Damon           | University of Chicago                      |
| Phillips      | Katherine       | Northwestern University                    |
| Pierce        | Lamar           | Washington University in St. Louis         |
| Pierson       | Margaret        | Harvard University                         |
| Pieters       | Rik             | Tilburg University                         |
| Piotroski     | Joseph          | Stanford University                        |
| Piskorski     | Tomasz          | Columbia University                        |
| Platt         | Brennan         | Brigham Young University                   |
| Pleskac       | Timothy         | Michigan State University                  |
| Plumlee       | Marlene         | University of Utah                         |
| Png           | Ivan P.L.       | National University of Singapore           |
| Polidoro      | Francisco       | University of Texas at Austin              |
| Polites       | Greta           | Bucknell University                        |
| Pollet        | Joshua          | Michigan State University                  |
| Pope          | Devin           | University of Chicago                      |
| Popescu       | Dana            | INSEAD                                     |
| Porter        | David           | Chapman University                         |
| Posen         | Hart            | University of Michigan                     |
| Poss          | Michael         | Université Libre de Bruxelles              |
| Pouget        | Sébastien       | Toulouse School of Economics               |
| Powell        | Warren          | Princeton University                       |
| Prasad        | Ashutosh        | University of Texas at Dallas              |
| Price         | Curtis          | University of Southern Indiana             |
| Price         | Joseph          | Brigham Young University                   |
| Priem         | Richard         | Texas Christian University                 |
| Prieto        | Rodolfo         | Boston University                          |
| Prigent       | Jean-Luc        | Cergy-Pontoise University                  |
| Prince        | Jeffrey         | Indiana University                         |
| Proano        | Ruben           | Rochester Institute of Technology          |
| Puranam       | Phanish         | London Business School                     |
| Purohit       | Debu            | Duke University                            |
| Putnins       | Talis           | Stockholm School of Economics in Riga      |
| Qian          | Meijun          | National University of Singapore           |
| Qing          | Ding            | Singapore Management University            |
| Radhakrishnan | Suresh          | University of Texas at Dallas              |
| Rahman        | Mohammad        | University of Calgary                      |
| Rahmandad     | Hazhir          | Virginia Tech                              |
| Rajagopalan   | Sampath         | University of Southern California          |
| Rajan         | Deepak          | Lawrence Livermore National Laboratory     |
| Rajiv         | Surendra        | National University of Singapore           |

|              |             |                                              |
|--------------|-------------|----------------------------------------------|
| Ramachandran | Karthik     | Southern Methodist University                |
| Ramachandran | Vandana     | University of Utah                           |
| Ramadorai    | Tarun       | Oxford University                            |
| Ramaprasad   | Jui         | McGill University                            |
| Ramirez      | Ronald      | University of Colorado Denver                |
| Randhawa     | Ramandeep   | University of Southern California            |
| Ransbotham   | Sam         | Boston College                               |
| Rantapuska   | Elias       | Aalto University                             |
| Rao          | Raghunath   | University of Texas at Austin                |
| Rao          | Ram         | University of Texas at Dallas                |
| Rauch        | James       | University of California at San Diego        |
| Rauh         | Michael     | Indiana University                           |
| Ravid        | Avri        | Rutgers University                           |
| Ravina       | Enrichetta  | Columbia University                          |
| Raviv        | Yaron       | Claremont McKenna College                    |
| Rawley       | Evan        | University of Pennsylvania                   |
| Ray          | Gautam      | University of Minnesota                      |
| Ray          | Saibal      | McGill University                            |
| Read         | Daniel      | Durham University                            |
| Rebitzer     | James       | Case Western Reserve University              |
| Redden       | Jjoseph     | University of Minnesota                      |
| Reeb         | David       | National University of Singapore             |
| Reed         | Adam        | University of North Carolina at Chapel Hill  |
| Reed         | Joshua      | New York University                          |
| Regibeau     | Pierre      | University of Essex                          |
| Reichelstein | Stefan      | Stanford University                          |
| Reisinger    | Christoph   | Oxford University                            |
| Reisinger    | Markus      | University of Munich                         |
| Ren          | Fei         | Peking University                            |
| Ren          | Justin      | Boston University                            |
| Ren          | Yuqing      | University of Minnesota                      |
| Rerup        | Claus       | University of Western Ontario                |
| Reuben       | Ernesto     | Columbia University                          |
| Reuter       | Jonathan    | Boston College                               |
| Rey Biel     | Pedro       | Universitat Autònoma de Barcelona            |
| Rhodes-Kropf | Matthew     | Harvard University                           |
| Rice         | Sarah       | University of Connecticut                    |
| Rick         | Scott       | University of Michigan                       |
| Rider        | Christopher | Emory University                             |
| Rime         | Dagfinn     | Norges Bank                                  |
| Rindfleisch  | Aric        | University of Wisconsin-Madison              |
| Rindisbacher | Marcel      | Boston University                            |
| Riordan      | Michael     | Columbia University                          |
| Riordan      | Ryan        | Karlsruhe Institute of Technology            |
| Rivera       | Mark        | Northwestern University                      |
| Roach        | Michael     | University of North Carolina at Chapel Hill  |
| Robb         | Alicia      | University of California, Santa Cruz         |
| Robe         | Michel      | American University                          |
| Roberts      | Peter       | Emory University                             |
| Robinson     | David       | Duke University                              |
| Robles       | Gregorio    | Universidad Rey Juan Carlos                  |
| Rocholl      | Jörg        | European School of Management and Technology |
| Rockart      | Scott       | Duke University                              |
| Roels        | Guillaume   | University of California, Los Angeles        |

|                  |              |                                                  |
|------------------|--------------|--------------------------------------------------|
| Rohde            | Kirsten      | Erasmus University Rotterdam                     |
| Romer            | David        | University of California, Berkeley               |
| Rosell           | Carlos       | Finance Canada                                   |
| Rosenthal        | Dale         | University of Illinois at Chicago                |
| Ross             | David        | Columbia University                              |
| Rothaermel       | Frank        | Georgia Institute of Technology                  |
| Rothschild       | David        | Yahoo! Research                                  |
| Rottenstreich    | Yuval        | New York University                              |
| Rountree         | Brian        | Rice University                                  |
| Rousseau         | Louis-Martin | Ecole Polytechnique de Montréal                  |
| Routledge        | Bryan        | Carnegie Mellon University                       |
| Rudi             | Nils         | INSEAD                                           |
| Ruetzler         | Daniela      | University of Innsbruck                          |
| Rusmevichientong | Paat         | University of Southern California                |
| Rust             | Roland       | University of Maryland                           |
| Rustichini       | Aldo         | University of Minnesota                          |
| Rutz             | Oliver       | Yale University                                  |
| Ryall            | Michael      | University of Toronto                            |
| Ryan             | Jennifer     | Rensselaer Polytechnic Institute                 |
| Rytchkov         | Oleg         | Temple University                                |
| Ryu              | Young        | University of Texas at Dallas                    |
| Saar             | Gideon       | Cornell University                               |
| Sabac            | Florin       | University of Alberta                            |
| Sadka            | Ronnie       | Boston College                                   |
| Sahin            | Ozge         | University of Michigan                           |
| Sahinidis        | Nikolaos     | Carnegie Mellon University                       |
| Said             | Maher        | Washington University in St. Louis               |
| Salmon           | Tim          | Florida State University                         |
| Salomon          | Robert       | New York University                              |
| Sami             | Rahul        | University of Michigan                           |
| Samila           | Sampsa       | Brock University                                 |
| Sampson          | Rachelle     | University of Maryland                           |
| Sanders          | Gerard       | Rice University                                  |
| Sandikci         | Burhaneddin  | University of Chicago                            |
| Sankaranarayanan | Ramesh       | University of Connecticut                        |
| Sansing          | Richard      | Dartmouth College                                |
| Santiago         | Leonardo     | Federal University of Minas Gerais               |
| Saouma           | Richard      | University of California, Los Angeles            |
| Sarath           | Bharat       | Rutgers University                               |
| Sarathy          | Rathindra    | Oklahoma State University                        |
| Sauermann        | Henry        | Georgia Institute of Technology                  |
| Saure            | Denis        | University of Pittsburgh                         |
| Saurez           | Sandra       | Temple University                                |
| Savaskan         | Canan        | Northwestern University                          |
| Savin            | Sergei       | University of Pennsylvania                       |
| Savor            | Pavel        | University of Pennsylvania                       |
| Savva            | Nicos        | London Business School                           |
| Sawyer           | Keith        | Washington University in St. Louis               |
| Saxena           | Anureet      | Axioma Inc.                                      |
| Scaillet         | Olivier      | University of Geneva and Swiss Finance Institute |
| Scarsini         | Marco        | LUISS                                            |
| Schaefer         | Andrew       | University of Pittsburgh                         |
| Schill           | Michael      | University of Virginia                           |
| Schlesinger      | Harris       | University of Alabama                            |

|            |            |                                                |
|------------|------------|------------------------------------------------|
| Schmidt    | Glen       | University of Utah                             |
| Schmidt    | Tobias     | German Institute for Economic Research         |
| Schmidt    | William    | Harvard University                             |
| Schneider  | Georg      | University of Paderborn                        |
| Schneider  | Jan        | University of Texas at Austin                  |
| Schoenung  | Julie      | University of California, Davis                |
| Scholten   | Marc       | ISPA University Institute                      |
| Schuerhoff | Norman     | University of Lausanne                         |
| Schweidel  | David      | University of Wisconsin-Madison                |
| Schwieren  | Christiane | University of Heidelberg                       |
| Seaborn    | Paul       | University of Toronto                          |
| Seamans    | Robert     | New York University                            |
| Seasholes  | Mark       | Hong Kong University of Science and Technology |

|              |           |                                             |
|--------------|-----------|---------------------------------------------|
| Secomandi    | Nicola    | Carnegie Mellon University                  |
| Seetharaman  | Seethu    | Washington University in St. Louis          |
| Segal        | Carmit    | Universitat Pompeu Fabra                    |
| Seiler       | Stephan   | Stanford University                         |
| Selove       | Matthew   | University of Southern California           |
| Sen          | Sankar    | Baruch College                              |
| Sengmueller  | Paul      | Tilburg University                          |
| Sengul       | Metin     | Boston College                              |
| Sensoy       | Berk      | The Ohio State University                   |
| Serrano      | Alejandro | Zaragoza Logistics Center                   |
| Seru         | Amit      | University of Chicago                       |
| Seshadri     | Sridhar   | University of Texas at Austin               |
| Sethuraman   | Jay       | Columbia University                         |
| Sethuraman   | Raj       | Southern Methodist University               |
| Sevilir      | Merih     | indiana university                          |
| Shackelford  | Douglas   | University of North Carolina at Chapel Hill |
| Shah         | Rachna    | University of Minnesota                     |
| Shakespeare  | Catherine | University of Michigan                      |
| Shalley      | Christina | Georgia Institute of Technology             |
| Shanbag      | Uday      | University of Illinois at Urbana-Champaign  |
| Shane        | Phil      | University of Colorado at Boulder           |
| Shang        | Kevin     | Duke University                             |
| Shanthikumar | Devin     | University of California, Irvine            |
| Shanthikumar | J. George | Purdue University                           |
| Sharkey      | Amanda    | University of Chicago                       |
| Shaver       | J. Myles  | University of Minnesota                     |
| Shechter     | Steven    | University of British Columbia              |
| Shen         | Haipeng   | University of North Carolina at Chapel Hill |
| Shen         | Qiaowei   | University of Pennsylvania                  |
| Sheremeta    | Roman     | Chapman University                          |
| Shi          | Lan       | University of Washington                    |
| Shi          | Mengze    | University of Toronto                       |
| Shields      | Timothy   | Chapman University                          |
| Shiller      | Ben       | University of Pennsylvania                  |
| Shimkin      | Nahum     | Technion                                    |
| Shin         | Hyoduk    | Northwestern University                     |
| Shin         | Jiwoong   | Yale University                             |
| Shin         | Sangwoo   | Purdue University                           |
| Shipilov     | Andrew    | INSEAD                                      |
| Shivendu     | Shivendu  | University of California, Irvine            |
| Shmueli      | Galit     | University of Maryland                      |

|           |                  |                                                |
|-----------|------------------|------------------------------------------------|
| Shriver   | Scott            | Columbia University                            |
| Shu       | Suzanne          | University of California, Los Angeles          |
| Shulman   | Jeffrey          | University of Washington                       |
| Shumway   | Tyler            | University of Michigan                         |
| Sias      | Richard          | Washington State University                    |
| Siddarth  | Sivaramakrishnan | University of Southern California              |
| Siegel    | Jordan           | Harvard University                             |
| Siemsen   | Enno             | University of Minnesota                        |
| Silverman | Brian            | University of Toronto                          |
| Simcoe    | Timothy          | Boston University                              |
| Simmons   | Joseph           | University of Pennsylvania                     |
| Simons    | Kenneth          | Rensselaer Polytechnic Institute               |
| Simonsohn | Uri              | University of Pennsylvania                     |
| Simonson  | Itamar           | Stanford University                            |
| Simpson   | Ana              | London School of Economics                     |
| Simpson   | Natalie          | University at Buffalo                          |
| Sin       | Raymond          | Hong Kong University of Science and Technology |

|                  |              |                                            |
|------------------|--------------|--------------------------------------------|
| Singh            | Harpreet     | University of Texas at Dallas              |
| Singh            | Jasjit       | INSEAD                                     |
| Singh            | Param Vir    | Carnegie Mellon University                 |
| Sinha            | Amitabh      | University of Michigan                     |
| Sismeiro         | Catarina     | Imperial College London                    |
| Sivaramakrishnan | Siddarth     | University of Southern California          |
| Skoulakis        | Georgios     | University of Maryland                     |
| Slonim           | Robert       | University of Sydney                       |
| Slotegraaf       | Rebecca      | Indiana University                         |
| Smith            | Angela Moore | James Madison University                   |
| Smith            | Edward       | University of Michigan                     |
| Smith            | J. Cole      | University of Florida                      |
| Smith            | J. Reed      | Indiana University                         |
| Smith            | Sanjukta     | University at Buffalo                      |
| Snyder           | Larry        | Lehigh University                          |
| So               | Anthony      | Chinese University of Hong Kong            |
| So               | Rick         | University of California, Irvine           |
| Sobek            | Durward      | Montana State University                   |
| Soberman         | David        | University of Toronto                      |
| Sohoni           | Milind       | Indian School of Business                  |
| So-in            | Chakchai     | Khon Kaen University                       |
| Soll             | Jack         | Duke University                            |
| Sommer           | Svenja       | HEC Paris                                  |
| Somoya           | Deepak       | University of Illinois at Urbana-Champaign |
| Sonenshein       | Scott        | Rice University                            |
| Song             | Minjae       | University of Rochester                    |
| Sood             | Ashish       | Emory University                           |
| Sopher           | Barry        | Rutgers University                         |
| Sorensen         | Erik         | Norwegian School of Economics              |
| Sorensen         | Morten       | Columbia University                        |
| Sorenson         | Olav         | Yale University                            |
| Sorescu          | Sorin        | Texas A&M University                       |
| Sosa             | M. Lourdes   | London Business School                     |
| Sosa             | Manuel       | INSEAD                                     |
| Sosic            | Greys        | University of Southern California          |
| Souder           | David        | University of Connecticut                  |
| Sougiannis       | Theodore     | University of Illinois at Urbana-Champaign |

|               |             |                                             |
|---------------|-------------|---------------------------------------------|
| Spalt         | Oliver      | Tilburg University                          |
| Spann         | Martin      | University of Munich                        |
| Spinler       | Stefan      | WHU                                         |
| Spiro         | Jarrett     | INSEAD                                      |
| Sprenger      | Charles     | University of California at San Diego       |
| Sridharan     | Swaminathan | Northwestern University                     |
| Srikanth      | Kannan      | Indian School of Business                   |
| Srinivasan    | Ananth      | University of Auckland                      |
| Staats        | Bradley     | University of North Carolina at Chapel Hill |
| Stallaert     | Jan         | University of Connecticut                   |
| Steenburgh    | Thomas      | Harvard University                          |
| Stefanescu    | Carmen      | ESSEC                                       |
| Stefanescu    | Catalina    | London Business School                      |
| Stefanescu    | Irina       | Indiana University                          |
| Steinberg     | Richard     | London School of Economics                  |
| Stephen       | Andrew      | University of Pittsburgh                    |
| Stephens      | Mel         | University of Michigan                      |
| Steyvers      | Mark        | University of California, Irvine            |
| Stieglitz     | Nils        | University of Southern Denmark              |
| Stier-Moses   | Nicolas     | Columbia University                         |
| Stinchcombe   | Maxwell     | University of Texas at Austin               |
| Stock         | Axel        | University of Central Florida               |
| Stoffman      | Noah        | Indiana University                          |
| Strebulaev    | Ilya        | Stanford University                         |
| Strobl        | Günter      | University of North Carolina at Chapel Hill |
| Strumpf       | Koleman     | University of Kansas                        |
| Stijis        | Stef        | University of Brabant                       |
| Stuart        | Harborne    | New York University                         |
| Stuart        | Toby        | Columbia University                         |
| Stubben       | Stephen     | University of North Carolina at Chapel Hill |
| Suarez        | Sandra      | Temple University                           |
| Subrahmanyam  | Avanidhar   | University of California, Los Angeles       |
| Subramanian   | Ravi        | Georgia Institute of Technology             |
| Subramanian   | Upender     | University of Texas at Dallas               |
| Suijs         | Jeroen      | Tilburg University                          |
| Summer        | Martin      | Oesterreichische Nationalbank               |
| Sun           | Amy         | Pennsylvania State University               |
| Sun           | Monic       | Stanford University                         |
| Sun           | Peng        | Duke University                             |
| Sundaram      | Rangarajan  | New York University                         |
| Sundararajan  | Arun        | New York University                         |
| Sundaesan     | Suresh      | Columbia University                         |
| Susarla       | Anjana      | Carnegie Mellon University                  |
| Sutcliffe     | Kathleen    | University of Michigan                      |
| Sutter        | Matthias    | University of Innsbruck                     |
| Swaminathan   | Anand       | Emory University                            |
| Swann         | Julie       | Georgia Institute of Technology             |
| Swinney       | Robert      | Stanford University                         |
| Syam          | Niladri     | University of Houston                       |
| Sydnor        | Justin      | University of Wisconsin-Madison             |
| Sykes         | Tracy       | Australian National University              |
| Sytch         | Maxim       | University of Michigan                      |
| Tafti         | Ali         | University of Illinois at Urbana-Champaign  |
| Tahbaz-Salehi | Alireza     | Columbia University                         |
| Takeishi      | Akira       | Kyoto University                            |

|             |           |                                              |
|-------------|-----------|----------------------------------------------|
| Takeuchi    | Kan       | Hitotsubashi University                      |
| Talebian    | Masoud    | University of Newcastle                      |
| Talluri     | Kalyan    | Universitat Pompeu Fabra                     |
| Tambe       | Prasanna  | New York University                          |
| Tan         | David     | Georgetown University                        |
| Tan         | Sharon    | National University of Singapore             |
| Tan Erciyas | Burcu     | Tulane University                            |
| Tandon      | Vivek     | National University of Singapore             |
| Tang        | Ke        | Renmin University                            |
| Tate        | Geoff     | University of California, Los Angeles        |
| Tayi        | Giri      | University at Albany                         |
| Taylor      | Lucian    | University of Pennsylvania                   |
| Tenorio     | Rafael    | DePaul University                            |
| Teoh        | Siew Hong | University of California, Irvine             |
| Tergiman    | Chloe     | New York University                          |
| Terlaak     | Ann       | University of Wisconsin-Madison              |
| Tervio      | Marko     | Aalto University                             |
| Tezcan      | Tolga     | University of Rochester                      |
| Tham        | Mandy     | Nanyang Technological University             |
| Thesmar     | David     | HEC Paris                                    |
| Thiele      | Veikko    | Queen's University                           |
| Thomadsen   | Raphael   | University of California, Los Angeles        |
| Thomas      | Catherine | Columbia University                          |
| Thomas      | Shawn     | University of Pittsburgh                     |
| Thompson    | Matthew   | Queen's University                           |
| Thompson    | Peter     | Emory University                             |
| Thöni       | Christian | University of St. Gallen                     |
| Tian        | Weidong   | University of North Carolina at Charlotte    |
| Tirunillai  | Seshadri  | University of Houston                        |
| Tiwana      | Amrit     | University of Georgia                        |
| Tobacman    | Jeremy    | University of Pennsylvania                   |
| Toffel      | Michael   | Harvard University                           |
| Tomlin      | Brian     | Dartmouth College                            |
| Tompaidis   | Stathis   | University of Texas at Austin                |
| Ton         | Zeynep    | Massachusetts Institute of Technology        |
| Tong        | Chunyang  | Shanghai University of Finance and Economics |
| Tong        | Shilu     | University of New South Wales                |
| Tookes      | Heather   | Yale University                              |
| Topaloglu   | Huseyin   | Cornell University                           |
| Torsvik     | Gaute     | University of Bergen                         |
| Toubia      | Olivier   | Columbia University                          |
| Tovey       | Craig     | Georgia Institute of Technology              |
| Towry       | Kristy    | Emory University                             |
| Trautmann   | Stefan    | University of Tilburg                        |
| Trichakis   | Nikolaos  | Massachusetts Institute of Technology        |
| Tripathi    | Arvind    | University of Washington                     |
| Tripathi    | Manish    | Emory University                             |
| Trolle      | Anders    | Ecole Polytechnique Fédérale de Lausanne     |
| Trueman     | Brett     | University of California, Los Angeles        |
| Trusov      | Michael   | University of Maryland                       |
| Tse         | Senyo     | Texas A&M University                         |
| Tsetlin     | Ilia      | INSEAD                                       |
| Tucker      | Anita     | Harvard University                           |
| Tucker      | Catherine | Massachusetts Institute of Technology        |
| Tucker      | Jenny     | University of Florida                        |

|                 |              |                                              |
|-----------------|--------------|----------------------------------------------|
| Tuli            | Kapil        | Singapore Management University              |
| Tumarkin        | Robert       | University of New South Wales                |
| Tunca           | Tunay        | Stanford University                          |
| Turcic          | Danko        | Washington University in St. Louis           |
| Turley          | Robert       | Harvard University                           |
| Turut           | Ozge         | Sabanci University                           |
| Tyagi           | Rajeev       | University of California, Irvine             |
| Ulku            | Sezer        | Georgetown University                        |
| Umyarov         | Akhmed       | University of Minnesota                      |
| Vaaler          | Paul         | University of Minnesota                      |
| Vakratsas       | Demetrios    | McGill University                            |
| Valentini       | Giovanni     | Bocconi University                           |
| Valenzuela      | Ana          | Baruch College                               |
| Van Biesebroeck | Johannes     | KU Leuven                                    |
| Van de Klundert | Joris        | Erasmus University Rotterdam                 |
| van de Kuilen   | Gijs         | Erasmus University Rotterdam                 |
| van de Rijt     | Arnout       | Stony Brook University                       |
| van de Ven      | Jeroen       | University of Amsterdam                      |
| van den Assem   | Martijn      | Erasmus University Rotterdam                 |
| Van den Bulte   | Christophe   | University of Pennsylvania                   |
| Van den Steen   | Eric         | Harvard University                           |
| van Dolder      | Dennie       | Erasmus University Rotterdam                 |
| van Praag       | Mirjam       | University of Amsterdam                      |
| Van Vyve        | Mathieu      | Université Catholique de Louvain             |
| Van Wesep       | Edward       | University of North Carolina at Chapel Hill  |
| Vanberg         | Christoph    | University of Heidelberg                     |
| Vanderbei       | Robert       | Princeton University                         |
| Veeraraghavan   | Senthil      | University of Pennsylvania                   |
| Veloso          | Francisco    | Carnegie Mellon University                   |
| Venkataraman    | Sriram       | Emory University                             |
| Venugopalan     | Raghu        | University of Illinois at Urbana-Champaign   |
| Veramendi       | Greg         | Northwestern University                      |
| Verbeek         | Marno        | Erasmus University Rotterdam                 |
| Verhoef         | Peter        | University of Groningen                      |
| Vernik          | Dinah        | Rice University                              |
| Vesterlund      | Lise         | University of Pittsburgh                     |
| Viard           | Brian        | Cheung Kong Graduate School of Business      |
| Vieider         | Ferdinand    | University of Munich                         |
| Villeval        | Marie-Claire | Centre National de la Recherche Scientifique |
| Vitorino        | Maria Ana    | University of Pennsylvania                   |
| Vogus           | Timothy      | Vanderbilt University                        |
| Vulcano         | Gustavo      | New York University                          |
| Wade            | James        | Georgetown University                        |
| Wagenhofer      | Alfred       | University of Graz                           |
| Wagstrom        | Patrick      | IBM Research                                 |
| Waguespack      | David        | University of Maryland                       |
| Wakker          | Peter        | Erasmus University Rotterdam                 |
| Walden          | Eric         | Texas Tech University                        |
| Waldman         | Michael      | Cornell University                           |
| Walker          | Dylan        | New York University                          |
| Wan             | Zhixi        | HEC Paris                                    |
| Wang            | Haiyan       | HP Labs                                      |
| Wang            | Sean         | University of North Carolina at Chapel Hill  |
| Wang            | Tan          | University of British Columbia               |
| Wang            | Tong         | National University of Singapore             |

|             |                  |                                                |
|-------------|------------------|------------------------------------------------|
| Wang        | Tracy            | University of Minnesota                        |
| Wang        | Xin              | Brandeis University                            |
| Wang        | Yimin            | Arizona State University                       |
| Wang        | Yu               | University of Texas at Dallas                  |
| Wang        | Yunzeng          | University of California, Riverside            |
| Ward        | Amy              | University of Southern California              |
| Warglien    | Massimo          | Ca' Foscari University                         |
| Wathieu     | Luc              | Georgetown University                          |
| Wattal      | Sunil            | Temple University                              |
| Webb        | Craig            | University of Manchester                       |
| Weber       | Martin           | University of Mannheim                         |
| Weber       | Roberto          | Carnegie Mellon University                     |
| Weddepohl   | Klaus            | University of Amsterdam                        |
| Wei         | Bin              | Baruch College                                 |
| Wei         | K.C. John        | Hong Kong University of Science and Technology |
|             |                  |                                                |
| Weiler      | Andreas          | University of Augsburg                         |
| Weintraub   | Gabriel          | Columbia University                            |
| Weisbenner  | Scott            | University of Illinois at Urbana-Champaign     |
| Wernerfelt  | Birger           | Massachusetts Institute of Technology          |
| Wertenbroch | Klaus            | INSEAD                                         |
| Westerfield | Mark             | University of Southern California              |
| Weston      | James            | Rice University                                |
| White       | Alexander        | Harvard University                             |
| White       | Judith           | Dartmouth College                              |
| Whited      | Toni             | University of Rochester                        |
| Whitt       | Ward             | Columbia University                            |
| Wiersema    | Margarethe       | University of California, Irvine               |
| Wiersma     | Eelke            | Free University Amsterdam                      |
| Wilbur      | Kenneth          | Duke University                                |
| Wildenbeest | Matthijs         | Indiana University                             |
| Wilhite     | Allen            | University of Alabama                          |
| Willen      | Paul             | Federal Reserve Bank of Boston                 |
| Williams    | Charles          | Bocconi University                             |
| Williams    | Heidi            | Massachusetts Institute of Technology          |
| Williamson  | Michael          | University of Texas at Austin                  |
| Willis      | Richard          | Vanderbilt University                          |
| Wilson      | Mungo            | Oxford University                              |
| Winter      | Ralph            | University of British Columbia                 |
| Woeginger   | Gerhard          | Eindhoven University of Technology             |
| Wolf        | Michael          | University of Zurich                           |
| Wollmann    | Thomas           | Harvard University                             |
| Wong        | Chi Leung (Adam) | Shanghai University of Finance and Economics   |
| Woodard     | C. Jason         | Singapore Management University                |
| Wooders     | John             | University of Arizona                          |
| Wooten      | Joel             | University of Pennsylvania                     |
| Wright      | Peter            | University of Memphis                          |
| Wu          | George           | University of Chicago                          |
| Wu          | Liuren           | Baruch College                                 |
| Wu          | Lynn             | Massachusetts Institute of Technology          |
| Wu          | Martin           | University of Illinois at Urbana-Champaign     |
| Wu          | Owen             | University of Michigan                         |
| Wu          | Stephen          | Hamilton College                               |
| Wu          | Yan (Diana)      | University of Kansas                           |
| Wu          | Yaozhong         | National University of Singapore               |

|              |              |                                                |
|--------------|--------------|------------------------------------------------|
| Xia          | Yusen        | Georgia State University                       |
| Xiang        | Yi           | Hong Kong University of Science and Technology |
| Xiao         | Erte         | Carnegie Mellon University                     |
| Xiao         | Mo           | University of Arizona                          |
| Xiao         | Wenqiang     | New York University                            |
| Xiao         | Zhixing      | China Europe International Business School     |
| Xie          | Min          | National University of Singapore               |
| Xin          | Mingdi       | University of British Columbia                 |
| Xing         | Yuhang       | Rice University                                |
| Xiong        | Wei          | Princeton University                           |
| Xiu          | Dacheng      | Princeton University                           |
| Xu           | Dachuan      | Beijing University of Technology               |
| Xu           | Lizhen       | Georgia Institute of Technology                |
| Xu           | Sean         | Tsinghua University                            |
| Xu           | Susan        | Pennsylvania State University                  |
| Xu           | Yi           | University of Maryland                         |
| Xu           | Ying         | Carnegie Mellon University                     |
| Xu           | Yuewu        | Fordham University                             |
| Xu           | Zeshui       | PLA University of Science and Technology       |
| Xue          | Mei          | Boston College                                 |
| Yafeh        | Yishay       | Hebrew University of Jerusalem                 |
| Yamada       | Yuji         | University of Tsukuba                          |
| Yan          | Hongjun      | Yale University                                |
| Yan          | Houmin       | Chinese University of Hong Kong                |
| Yan          | Lu           | University of Washington                       |
| Yan          | Philip       | Princeton University                           |
| Yan          | Shu          | University of South Carolina                   |
| Yan          | Xuemin       | University of Missouri                         |
| Yang         | Jian         | New Jersey Institute of Technology             |
| Yang         | Jun          | Indiana University                             |
| Yang         | Liyan        | University of Toronto                          |
| Yang         | Nan          | Washington University in St. Louis             |
| Yang         | Sha          | University of Southern California              |
| Yang         | Song Alex    | London Business School                         |
| Yang         | Zhibin (Ben) | University of Oregon                           |
| Yankovic     | Natalie      | IESE Business School                           |
| Yao          | David        | Columbia University                            |
| Yao          | Song         | Northwestern University                        |
| Yao          | Tao          | Pennsylvania State University                  |
| Yao          | Yuliang      | Lehigh University                              |
| Yasuda       | Ayako        | University of California, Davis                |
| Yayavaram    | Sai          | National University of Singapore               |
| Ye           | Mao          | University of Illinois at Urbana-Champaign     |
| Yin          | Pai-Ling     | Massachusetts Institute of Technology          |
| Yin          | Rui          | Arizona State University                       |
| Yin          | Shuya        | University of California, Irvine               |
| Yoganasimhan | Hema         | University of California, Davis                |
| Yogo         | Motohiro     | Federal Reserve Bank of Minneapolis            |
| Yoo          | Byungjoon    | Seoul National University                      |
| You          | Haifeng      | Hong Kong University of Science and Technology |
| Yu           | Fan          | Claremont McKenna College                      |
| Yu           | Man          | Hong Kong University of Science and Technology |

|                |                    |                                                |
|----------------|--------------------|------------------------------------------------|
| Yuan           | Kathy              | London School of Economics                     |
| Yue            | Wei                | City University of Hong Kong                   |
| Zachariadis    | Konstantinos       | London School of Economics                     |
| Zaheer         | Aks                | University of Minnesota                        |
| Zaheer         | Srilata            | University of Minnesota                        |
| Zarutskie      | Rebecca            | Duke University                                |
| Zawadowski     | Adam               | Princeton University                           |
| Zeithammer     | Robert             | University of California, Los Angeles          |
| Zelner         | Bennet             | Duke University                                |
| Zeltyn         | Sergey             | IBM Research                                   |
| Zender         | Jaime              | University of Colorado at Boulder              |
| Zenger         | Todd               | Washington University in St. Louis             |
| Zentner        | Alejandro          | University of Texas at Dallas                  |
| Zhang          | Dan                | University of Colorado at Boulder              |
| Zhang          | Frank              | Yale University                                |
| Zhang          | Hanjiang           | Nanyang Technological University               |
| Zhang          | Hao                | University of Southern California              |
| Zhang          | Hongtao            | Hong Kong University of Science and Technology |
| Zhang          | Jane               | University of California, Berkeley             |
| Zhang          | Jie                | University of Texas at Arlington               |
| Zhang          | Juanjuan           | Massachusetts Institute of Technology          |
| Zhang          | Laurina            | University of Toronto                          |
| Zhang          | Rachel             | Hong Kong University of Science and Technology |
| Zhang          | Xiao-Jun           | University of California, Berkeley             |
| Zhang          | Xiaoquan (Michael) | Hong Kong University of Science and Technology |
| Zhang          | Xiaoyan            | Purdue University                              |
| Zhang          | Xubing             | Hong Kong Polytechnic University               |
| Zhang          | Yun                | George Washington University                   |
| Zhang          | Zhe                | Western Washington University                  |
| Zhao           | Feng               | University of Texas at Dallas                  |
| Zhao           | Huimin             | University of Wisconsin-Milwaukee              |
| Zhao           | Minyuan            | University of Michigan                         |
| Zhao           | Wenhui             | Washington University in St. Louis             |
| Zhao           | Yao                | Rutgers University                             |
| Zhdanov        | Dmitry             | University of Connecticut                      |
| Zheng          | Yanchong           | Massachusetts Institute of Technology          |
| Zhou           | Guofu              | Washington University in St. Louis             |
| Zhou           | Hao                | Federal Reserve Board of Governors             |
| Zhou           | Jidong             | New York University                            |
| Zhou           | Sean               | Chinese University of Hong Kong                |
| Zhou           | Yong-Pin           | University of Washington                       |
| Zhu            | Feng               | University of Southern California              |
| Zhu            | Meng               | Johns Hopkins University                       |
| Zhu            | Ting               | University of Chicago                          |
| Zhu            | Wanshan            | Tsinghua University                            |
| Ziedonis       | Rosemarie          | University of Oregon                           |
| Zikmund-Fisher | Brian              | University of Michigan                         |
| Zimmermann     | Hans-Jürgen        | RWTH Aachen University                         |
| Ziya           | Serhan             | University of North Carolina at Chapel Hill    |
| Zmud           | Robert             | University of Oklahoma                         |
| Zopounidis     | Constantin         | Technical University of Crete                  |
| Zott           | Christoph          | INSEAD                                         |

Zubcsek  
Zwick

Peter Pal  
Rami

University of Florida  
University of California, Riverside
